# Supplementary material
Source: ML conference proceedings conference paper supplement (https://proceedings.mlr.press/v139/balseiro21a.html)
Supplement: Supplementary file 3 [file balseiro21a-supp.zip]

Archive with 24 entries (21 files):
- ICML_full.pdf
- __MACOSX/._ICML_full.pdf
- ICML_submitted_code/
- __MACOSX/._ICML_submitted_code
- ICML_submitted_code/code/
- __MACOSX/ICML_submitted_code/._code
- ICML_submitted_code/adx-alloc-data-2014/
- __MACOSX/ICML_submitted_code/._adx-alloc-data-2014
- ICML_submitted_code/README.txt
- __MACOSX/ICML_submitted_code/._README.txt
- ICML_submitted_code/code/compute_opt.py
- __MACOSX/ICML_submitted_code/code/._compute_opt.py
- ICML_submitted_code/code/plot_for_paper.py
- __MACOSX/ICML_submitted_code/code/._plot_for_paper.py
- ICML_submitted_code/code/main.py
- __MACOSX/ICML_submitted_code/code/._main.py
- ICML_submitted_code/adx-alloc-data-2014/pub2-adx.txt
- __MACOSX/ICML_submitted_code/adx-alloc-data-2014/._pub2-adx.txt
- ICML_submitted_code/adx-alloc-data-2014/pub2-sample.txt
- __MACOSX/ICML_submitted_code/adx-alloc-data-2014/._pub2-sample.txt
- ICML_submitted_code/adx-alloc-data-2014/pub2-types.txt
- __MACOSX/ICML_submitted_code/adx-alloc-data-2014/._pub2-types.txt
- ICML_submitted_code/adx-alloc-data-2014/pub2-ads.txt
- __MACOSX/ICML_submitted_code/adx-alloc-data-2014/._pub2-ads.txt
