# Supplementary material
Source: ML conference proceedings conference paper supplement (https://proceedings.mlr.press/v139/balseiro21a.html)
Supplement: Supplementary file 3 [file balseiro21a-supp.zip › ICML_submitted_code/adx-alloc-data-2014/pub2-ads.txt]

advertiser: 1 rho: 0.0291358740826171
advertiser: 2 rho: 0.0150761786316006
advertiser: 3 rho: 0.1461114365276430
advertiser: 4 rho: 0.0237110126257335
advertiser: 5 rho: 0.0837656914155494
advertiser: 6 rho: 0.0824262118655465
advertiser: 7 rho: 0.2407947902169433
advertiser: 8 rho: 0.0883766843905413
advertiser: 9 rho: 0.0455049033121139
advertiser: 10 rho: 0.0262230715718695
advertiser: 11 rho: 0.0097135973581833
advertiser: 12 rho: 0.0994605480016586
