# Supplementary material
Source: ML conference proceedings conference paper supplement (https://proceedings.mlr.press/v139/balseiro21a.html)
Supplement: Supplementary file 3 [file balseiro21a-supp.zip › ICML_submitted_code/adx-alloc-data-2014/pub2-sample.txt]

0	29.673	0	27.157	0	26.725	27.15	0	0	28.48	0	0
0	23.584	74.797	23.077	0	28.127	26.87	40.702	0	31.706	0	0
0	48.165	0	53.508	0	72.002	81.577	0	0	48.354	0	0
0	11.785	0	12.116	0	9.3939	9.4262	0	0	12.519	11.043	18.054
0	32.415	0	41.569	0	49.178	52.616	0	0	31.553	32.372	52.229
0	82.596	0	89.148	0	36.735	58.852	0	0	78.943	0	0
0	0	0	0	8.699	0	0	0	0	0	0	0
0	0	0	0	24.514	0	0	0	0	0	0	0
0	0	0	0	42.904	0	0	0	0	0	0	0
0	70.079	0	85.849	0	58.802	60.569	0	0	96.584	0	0
0	44.763	69.948	40.626	0	42.318	43.158	67.458	0	45.922	0	0
743.79	0	0	0	46.924	0	0	0	33.124	0	0	0
0	58.124	0	58.638	0	77.877	68.109	0	0	54.263	63.824	69.878
0	46.784	0	41.608	0	56.886	55.198	0	0	43.486	34.01	51.055
0	0	0	0	11.063	0	0	0	13.013	0	0	0
0	0	0	0	22.572	0	0	0	14.398	0	0	0
0	184.93	0	176.29	0	85.151	97.895	0	0	144.66	0	0
0	0	0	0	14.76	0	0	0	26.813	0	0	0
0	50.004	14.657	56.502	0	60.164	74.627	27.418	0	51.969	0	0
0	68.789	14.8	65.6	0	59.869	57.325	27.234	0	61.051	71.506	93.657
0	47.408	0	46.594	0	59.533	52.531	0	0	43.738	0	0
0	63.841	0	66.515	0	55.547	50.287	0	0	63.3	59.834	83.964
0	26.46	11.227	24.229	0	20.736	16.42	19.465	0	25.018	0	0
0	38.712	0	39.567	0	57.981	58.921	0	0	29.448	28.883	45.705
0	82.86	0	85.805	0	75.446	77.577	0	0	92.107	85.614	170.59
0	32.196	0	32.655	0	26.361	22.425	0	0	36.971	0	0
0	53.259	0	69.559	0	86.704	84.845	0	0	58.336	66.366	101.72
314.81	0	0	0	18.908	0	0	0	27.019	0	0	0
0	58.881	20.823	72.717	0	37.585	36.58	35.466	0	67.019	0	0
0	40.807	0	37.818	0	46.36	45.246	0	0	27.064	28.749	36.079
0	18.039	0	17.142	0	19.799	20.661	0	0	15.767	16.468	18.14
0	25.02	0	20.949	0	15.836	16.764	0	0	21.555	20.262	23.428
0	54.914	0	57.165	0	39.144	30.963	0	0	55.651	50.786	82.376
0	87.241	52.758	96.524	0	41.991	46.369	76.514	0	100.84	89.547	120.47
0	29.767	0	30.903	0	16.487	19.633	0	0	31.252	0	0
0	44.595	0	37.863	0	99.837	97.82	0	0	39.533	49.106	53.253
0	44.121	0	46.884	0	22.151	31.509	0	0	46.309	43.981	64.403
0	82.207	55.309	94.419	0	43.221	42.879	86.649	0	66.569	0	0
0	27.357	12.91	28.589	0	18.575	16.524	22.085	0	28.112	0	0
0	55.205	29.8	51.527	0	43.253	35.026	41.061	0	55.781	64.513	64.307
0	44.072	56.049	37.437	0	30.092	34.022	52.192	0	33.531	0	0
212.33	0	0	0	12.697	0	0	0	20.672	0	0	0
0	42.637	0	37.605	0	47.911	42.289	0	0	32.096	37.345	48.911
0	26.233	14.309	23.667	0	30.526	21.783	18.921	0	30.748	0	0
0	25.651	0	31.972	0	18.22	21.598	0	0	32.665	31.26	37.995
0	54.744	4.6832	53.792	0	50.315	56.538	13.483	0	48.043	0	0
0	0	0	0	30.973	0	0	0	0	0	0	0
0	94.779	0	73.96	0	52.573	53.273	0	0	87.132	74.496	116.95
0	0	0	0	34.382	0	0	0	0	0	0	0
0	20.984	36.228	22.348	0	14.823	14.053	37.252	0	19.11	0	0
0	36.549	0	29.693	0	19.122	21.677	0	0	30.063	42.98	38.057
0	0	0	0	8.0177	0	0	0	0	0	0	0
0	59.956	36.754	72.899	0	73.77	63.988	61.181	0	69.85	70.257	96.11
2085	0	0	0	139.48	0	0	0	84.586	0	0	0
0	0	0	0	11.676	0	0	0	30.871	0	0	0
0	56.878	63.532	47.454	0	41.651	38.822	98.159	0	57.506	0	0
0	30.882	14.076	35.565	0	30.481	29.327	26.324	0	37.91	0	0
0	39.929	14.186	36.903	0	42.672	44.274	18.12	0	41.794	0	0
0	67.391	0	56.745	0	36.918	29.611	0	0	59.936	0	0
0	0	0	0	12.689	0	0	0	0	0	0	0
0	0	0	0	12.642	0	0	0	0	0	0	0
0	8.4887	0	8.671	0	10.094	9.3473	0	0	9.0923	8.1647	13.537
0	44.985	155.83	42.057	0	29.256	28.77	187.43	0	45.573	36.49	52.188
0	55.611	0	43.029	0	56.363	46.09	0	0	49.465	0	0
0	69.695	0	65.891	0	44.182	45.743	0	0	73.229	0	0
458.91	0	0	0	28.605	0	0	0	14.344	0	0	0
0	34.118	9.5177	33.185	0	17.439	18.674	18.575	0	36.827	0	0
0	49.762	64.288	38.509	0	24.949	29.258	59.5	0	42.124	47.28	67.346
0	20.679	0	20.172	0	14.382	12.973	0	0	22.932	20.804	29.481
0	0	0	0	20.6	0	0	0	11.171	0	0	0
0	0	0	0	16.731	0	0	0	0	0	0	0
0	39.221	0	32.676	0	85.753	108.29	0	0	33.75	33.925	42.227
0	52.86	15.543	48.567	0	26.724	24.399	32.191	0	41.505	0	0
0	48.535	4.2466	39.226	0	55.92	51.345	12.692	0	55.563	0	0
0	45.39	0	46.468	0	30.518	36.229	0	0	61.389	0	0
0	37.172	13.554	28.54	0	28.276	25.045	22.649	0	30.161	32.592	36.295
0	22.005	0	27.45	0	19.981	20.431	0	0	25.212	0	0
0	13.99	0	13.844	0	15.148	18.558	0	0	11.682	0	0
0	20.536	14.088	16.723	0	14.315	17.855	18.423	0	16.894	0	0
0	0	0	0	46.684	0	0	0	37.924	0	0	0
0	0	0	0	11.132	0	0	0	0	0	0	0
0	18.516	0	23.271	0	83.883	85.434	0	0	17.333	21.374	26.435
0	37.625	43.981	37.81	0	30.507	28.559	53.281	0	37.254	36.019	43.784
0	40.359	36.694	41.074	0	47.406	50.884	29.858	0	42.299	0	0
0	35.442	9.9776	31.639	0	20.521	22.417	16.174	0	35.63	0	0
0	36.567	39.588	40.469	0	40.785	55.223	32.532	0	33.667	0	0
0	20.88	23.221	21.102	0	15.984	14.254	35.248	0	20.455	0	0
0	0	0	0	8.4758	0	0	0	0	0	0	0
0	56.705	14.893	62.992	0	58.521	56.475	21.737	0	63.067	70.257	74.794
0	59.737	11.636	58.687	0	39.776	36.493	32.049	0	53.62	57.724	77.082
0	36.659	9.1558	40.255	0	23.255	30.384	28.006	0	41.648	36.935	47.771
0	37.37	0	45.905	0	21.998	21.13	0	0	37.054	0	0
0	52.28	21.848	58.391	0	65.552	56.482	35.072	0	58.032	0	0
0	20.354	8.6424	18.033	0	11.693	9.8195	13.018	0	16.688	17.657	31.739
0	0	0	0	23.963	0	0	0	11.418	0	0	0
0	22.109	22.837	23.299	0	23.017	21.905	23.699	0	28.987	22.949	36.319
1346	0	0	0	129.66	0	0	0	47.832	0	0	0
0	50.215	28.524	37.597	0	45.008	50.725	47.997	0	50.344	45.736	49.01
0	61.86	13.98	62.044	0	27.313	30.381	23.1	0	51.398	0	0
0	18.509	0	23.098	0	13.551	13.78	0	0	16.497	0	0
0	28.439	0	21.986	0	19.943	19.976	0	0	28.002	25.617	36.264
0	68.281	0	70.655	0	74.423	70.118	0	0	76.485	61.056	87.514
825.73	0	0	0	52.088	0	0	0	62.916	0	0	0
0	0	0	0	7.3738	0	0	0	2.7092	0	0	0
0	57.083	5.0297	63.389	0	78.694	68.849	13.105	0	53.476	0	0
0	43.827	0	51.598	0	56.647	49.875	0	0	43.819	48.29	92.709
0	61.356	41.708	70.25	0	57.689	53.342	74.36	0	65.845	0	0
0	23.878	0	24.074	0	20.411	19.386	0	0	21.076	27.023	21.08
0	51.279	56.3	45.753	0	34.776	38.407	54.7	0	51.348	0	0
0	47.322	12.909	44.244	0	28.35	26.471	23.546	0	49.398	0	0
0	50.123	16.431	60.918	0	68.575	39.933	54.804	0	50.348	65.738	64.175
0	35.545	28.98	34.77	0	19.826	19.343	32.795	0	36.288	39.394	38.595
0	63.678	15.874	66.101	0	39.092	45.28	31.258	0	71.381	0	0
0	76.552	0	71.502	0	102.15	98.077	0	0	66.546	57.686	65.239
0	62.679	0	69.897	0	129.73	108.55	0	0	73.547	67.94	91.441
0	33.252	0	30.039	0	41.068	41.996	0	0	29.894	31.967	39.351
0	61.825	228.15	54.513	0	33.736	28.95	159.32	0	53.71	63.504	58.216
0	25.614	0	22.548	0	23.887	21.023	0	0	25.268	31.407	38.41
0	21.175	32.522	29.722	0	14.901	18.541	42.944	0	24.916	23.67	41.273
0	37.809	0	40.908	0	37.477	38.836	0	0	37.601	0	0
0	91.68	0	84.405	0	43.293	53.434	0	0	86.36	0	0
0	50.237	52.462	46.083	0	42.678	51.976	44.393	0	47.822	0	0
0	22.883	4.8889	22.985	0	16.278	13.349	10.354	0	31.937	0	0
0	0	0	0	21.785	0	0	0	20.424	0	0	0
0	15.689	0	18.605	0	28.376	24.822	0	0	18.669	17.874	15.894
0	40.137	22.212	40.827	0	23.293	28.108	48.437	0	40.691	34.835	60.913
0	25.935	15.261	23.116	0	14.854	14.4	38.8	0	24.05	29.527	37.125
0	0	0	0	17.36	0	0	0	0	0	0	0
0	46.899	0	54.205	0	48.837	38.148	0	0	46.034	45.375	53.638
0	66.767	22.878	70.484	0	57.125	52.009	52.756	0	65.027	0	0
406.83	0	0	0	42.82	0	0	0	30.923	0	0	0
0	52.897	24.927	58.293	0	30.522	25.477	39.041	0	42.694	0	0
0	37.401	0	39.028	0	26.467	24.973	0	0	44.471	37.58	66.457
0	50.614	0	53.607	0	27.389	33.164	0	0	54.292	52.453	86.28
0	72.294	0	76.264	0	69.733	98.328	0	0	75.97	73.761	91.914
0	17.979	0	16.711	0	8.8804	8.9116	0	0	15.526	0	0
0	58.572	0	56.244	0	49.552	55.114	0	0	58.562	0	0
0	39.377	0	35.53	0	45.496	44.385	0	0	39.888	45.599	36.63
0	27.628	0	35.109	0	40.409	40	0	0	26.217	35.024	37.543
0	48.198	0	41.84	0	44.603	47.882	0	0	46.746	42.16	54.007
0	36.483	0	37.456	0	52.533	50.999	0	0	36.72	38.966	60.282
0	86.113	0	75.193	0	84.718	75.816	0	0	69.963	0	0
270.93	0	0	0	17.129	0	0	0	25.109	0	0	0
0	86.497	21.176	98.063	0	74.053	75.83	42.373	0	75.468	108.15	115.01
0	71.024	0	77.059	0	53.632	43.5	0	0	63.397	71.157	100.48
0	41.74	29.646	43.866	0	55.295	53.016	38.916	0	36.1	32.763	42.776
0	39.362	16.371	40.548	0	34.018	33.79	43.681	0	42.096	0	0
0	0	0	0	44.97	0	0	0	0	0	0	0
0	46.684	33.513	56.653	0	31.997	35	58.681	0	53.865	0	0
0	33.086	355.82	30.833	0	29.018	21.968	207.59	0	30.808	30.562	35.907
0	41.811	0	50.235	0	67.238	54.458	0	0	42.881	42.614	58.329
0	63.667	0	47.766	0	32.62	39.088	0	0	49.181	0	0
0	54.336	0	60.241	0	52.273	58.041	0	0	57.415	72.318	72.394
0	22.081	0	20.232	0	13.935	17.697	0	0	22.662	0	0
327.34	0	0	0	39.211	0	0	0	32.502	0	0	0
0	113.18	0	85.489	0	88.749	93.611	0	0	82.045	0	0
438.17	0	0	0	61.836	0	0	0	50.85	0	0	0
0	37.976	38.381	30.479	0	30.396	33.413	52.848	0	33.269	35.971	54.072
0	0	0	0	10.225	0	0	0	0	0	0	0
0	38.71	55.165	39.146	0	23.461	26.176	56.707	0	35.414	0	0
0	48.306	52.259	44.437	0	84.907	85.735	66.542	0	39.777	43.396	42.276
0	35.052	0	37.671	0	30.06	36.162	0	0	35.119	32.403	61.549
0	0	0	0	25.126	0	0	0	18.599	0	0	0
0	61.583	0	62.361	0	48.2	55.031	0	0	65.648	51.02	75.278
0	21.733	0	18.593	0	15.276	14.287	0	0	17.381	0	0
0	23.551	5.395	23.546	0	13.826	16.568	9.2165	0	25.673	0	0
288.69	0	0	0	23.8	0	0	0	36.373	0	0	0
0	37.979	26.191	35.552	0	25.559	18.586	29.475	0	48.127	0	0
0	59.62	0	68.485	0	51.687	58.711	0	0	61.123	82.024	90.743
0	24.206	0	23.476	0	18.678	16.42	0	0	24.723	25.482	25.471
436.06	0	0	0	14.162	0	0	0	10.993	0	0	0
0	0	0	0	15.849	0	0	0	0	0	0	0
0	0	0	0	16.112	0	0	0	0	0	0	0
0	47.601	9.754	46.016	0	26.845	26.097	26.85	0	53.58	0	0
0	41.981	19.057	41.642	0	34.019	38.721	18.481	0	38.827	0	0
0	68.311	8.1763	57.814	0	51.878	56.479	24.475	0	62.065	0	0
0	49.434	0	41.869	0	18.647	20.749	0	0	44.743	0	0
0	28.849	8.4492	26.172	0	16.426	14.6	20.51	0	27	0	0
0	26.455	163.86	24.684	0	13.495	16.04	81.136	0	29.459	0	0
0	26.584	14.562	26.46	0	17.108	17.01	19.234	0	24.125	23.758	28.965
0	59.951	0	60.764	0	77.878	62.583	0	0	53.933	0	0
0	27.229	4.0846	32.133	0	8.2206	7.6061	13.002	0	32.286	32.138	34.212
0	49.182	11.298	47.927	0	31.838	41.809	24.324	0	57.317	0	0
0	26.414	0	24.954	0	19.896	20.935	0	0	24.332	26.185	38.926
0	32.722	35.212	29.107	0	23.553	26.108	56.675	0	29.065	0	0
0	84.692	0	91.267	0	93.2	86.47	0	0	96.289	0	0
0	56.991	0	64.774	0	34.831	31.663	0	0	82.167	77.242	85.815
0	62.184	17.083	66.833	0	47.662	56.249	28.381	0	68.257	0	0
0	51.242	10.332	46.875	0	33.082	45.256	13.737	0	61.326	0	0
0	56.107	56.597	55.089	0	44.585	53.4	80.585	0	47.896	0	0
0	35.843	7.9535	39.401	0	31.263	29.604	17.075	0	42.514	0	0
0	28.021	9.8573	28.72	0	13.846	15.928	23.238	0	28.448	0	0
0	44.213	0	45.744	0	41.592	44.212	0	0	49.067	50.713	61.6
0	27.039	82.514	27.847	0	14.163	15.296	52.612	0	20.981	24.021	26.567
0	31.297	70.119	29.017	0	13.072	12.527	59.591	0	25.896	28.219	41.042
0	0	0	0	11.868	0	0	0	0	0	0	0
0	47.419	0	45.023	0	39.688	51.088	0	0	61.125	44.825	58.613
0	39.977	29.117	31.848	0	53.01	44.287	42.491	0	28.299	0	0
0	35.757	0	29.608	0	33.637	31.933	0	0	34.084	37.541	37.466
0	18.218	0	20.325	0	22.332	22.231	0	0	20.228	16.509	27.79
0	19.649	0	14.302	0	21.329	22.161	0	0	14.414	16.814	20.32
0	25.454	0	22.489	0	37.725	36.1	0	0	22.82	26.043	29.551
0	29.549	0	31.081	0	21.122	25.529	0	0	25.644	28.11	31.892
0	49.14	10.316	42.295	0	55.458	38.983	16.876	0	44.572	41.457	47.97
0	17.671	0	20.241	0	16.219	17.719	0	0	19.431	20.801	25.141
0	49.244	53.695	54.857	0	66.761	46.276	64.227	0	49.524	0	0
0	30.127	6.8482	26.821	0	35.797	29.437	14.092	0	34.365	0	0
0	29.335	0	27.243	0	29.678	24.276	0	0	25.794	24.109	28.693
0	29.238	0	26.004	0	17.438	15.548	0	0	23.145	0	0
0	32.624	36.092	26.255	0	17.226	24.26	37.223	0	25.641	0	0
0	36.814	0	40.941	0	33.635	39.614	0	0	40.837	0	0
0	27.239	0	21.3	0	11.736	11.51	0	0	21.906	0	0
342.51	0	0	0	73.489	0	0	0	46.81	0	0	0
0	28.69	0	34.506	0	14.635	18.152	0	0	24.043	27.584	32.875
0	21.336	0	28.342	0	21.765	21.612	0	0	24.421	26.902	25.614
0	38.242	0	38.358	0	18.74	27.27	0	0	45.722	46.124	42.499
0	32.736	23.865	39.837	0	15.396	15.126	31.099	0	33.392	34.415	37.295
0	52.026	0	58.032	0	67.006	63.722	0	0	56.704	53.43	61.501
488.73	0	0	0	9.2286	0	0	0	4.2273	0	0	0
0	25.838	50.237	30.38	0	16.043	16.304	41.385	0	24.489	30.803	39.788
0	71.94	46.388	89.182	0	42.99	42.264	71.136	0	93.294	0	0
0	22.652	6.8761	30.785	0	21.378	19.774	13.606	0	20.395	0	0
0	36.853	0	35.425	0	35.531	41.898	0	0	35.721	0	0
0	39.576	2.1756	31.619	0	26.127	27.563	9.895	0	45.85	38.86	58.962
0	0	0	0	27.703	0	0	0	32.401	0	0	0
0	36.773	12.143	42.573	0	31.094	27.49	22.229	0	35.441	0	0
0	62.324	45.433	65.251	0	49.836	50.206	82.303	0	67.413	0	0
0	34.251	0	30.546	0	35.861	35.528	0	0	34.675	31.236	35.999
0	86.906	0	75.027	0	97.005	110	0	0	78.692	76.366	77.243
0	49.768	0	51.577	0	33.627	33.695	0	0	49.309	0	0
0	35.258	7.9081	39.086	0	27.638	28.711	16.136	0	40.618	0	0
0	0	0	0	26.72	0	0	0	24.932	0	0	0
0	0	0	0	18.852	0	0	0	22.619	0	0	0
0	0	0	0	30.074	0	0	0	71.279	0	0	0
0	23.022	0	24.999	0	28.697	27.668	0	0	22.06	23.61	32.508
0	20.452	18.389	19.046	0	9.1895	11.082	16.339	0	23.59	0	0
0	10.5	13.083	11.547	0	6.6848	6.9	16.343	0	13.163	0	0
0	0	0	0	20.886	0	0	0	23.362	0	0	0
0	0	0	0	17.238	0	0	0	3.6529	0	0	0
0	43.47	0	46.751	0	47.779	45.589	0	0	36.324	55.762	59.419
0	21.411	0	24.892	0	33.654	31.56	0	0	24.849	26.386	32.98
0	0	0	0	33.536	0	0	0	0	0	0	0
0	13.877	0	12.082	0	5.9396	6.0626	0	0	12.39	0	0
0	41.028	0	33.503	0	41.128	39.145	0	0	39.793	38.399	46.548
0	33.931	0	41.309	0	54.623	61.375	0	0	41.372	0	0
0	49.761	0	55.521	0	92.478	91.188	0	0	46.986	48.499	66.724
0	94.497	35.901	87.375	0	44.8	39.229	63.608	0	101.21	0	0
0	22.432	24.251	14.568	0	12.272	10.388	23.233	0	22.559	0	0
0	31.467	21.874	42.357	0	22.192	18.982	37.789	0	38.973	0	0
0	85.146	0	101.09	0	68.425	72.278	0	0	88.203	103.45	124.24
0	0	0	0	41.335	0	0	0	41.163	0	0	0
0	27.49	2.2185	28.467	0	44.02	31.728	7.2741	0	28.071	0	0
0	0	0	0	20.256	0	0	0	0	0	0	0
0	68.941	12.888	80.105	0	62.681	60.787	35.295	0	73.74	0	0
0	27.894	0	31.173	0	23.616	29.03	0	0	30	0	0
0	67.886	17.225	70.135	0	49.965	64.094	41.075	0	58.675	0	0
617.52	0	0	0	15.068	0	0	0	18.119	0	0	0
0	105.58	142.12	113.94	0	44.938	49.694	99.266	0	117.68	0	0
0	0	0	0	8.6217	0	0	0	5.2861	0	0	0
0	0	0	0	11.681	0	0	0	11.474	0	0	0
0	29.279	0	36.891	0	18.372	17.612	0	0	34.117	35.029	38.235
263.43	0	0	0	10.223	0	0	0	20.242	0	0	0
0	118.16	0	93.784	0	159.57	153.91	0	0	136.64	0	0
0	90.987	0	80.714	0	64.514	69.833	0	0	97.132	0	0
0	28.567	88.17	30.788	0	25.573	24.554	75.748	0	29.131	33.378	28.211
0	102.97	36.065	101.28	0	143.03	132.99	63.144	0	99.906	0	0
0	48.608	0	53.49	0	63.93	54.13	0	0	63.038	0	0
0	17.699	0	20.047	0	9.6545	12.82	0	0	19.372	0	0
0	42.594	1.7006	39.784	0	39.794	35.547	10.902	0	36.75	41.932	36.558
0	0	0	0	9.6977	0	0	0	22.765	0	0	0
0	7.8389	0	8.9335	0	3.5766	3.6266	0	0	10.152	0	0
0	28.484	0	37.327	0	31.743	32.121	0	0	28.945	32.207	32.761
0	33.346	8.7194	29.113	0	56.713	61.885	15.211	0	35.853	38.917	43.636
0	65.235	0	66.083	0	60.942	71.845	0	0	57.681	61.132	63.483
0	86.91	0	74.624	0	139.62	145.26	0	0	83.592	89.779	98.853
0	50.939	17.21	58.859	0	20.609	18.157	44.585	0	60.499	0	0
0	42.694	0	42.199	0	49.051	52.249	0	0	49.955	48.436	50.802
0	65.822	15.544	71.147	0	37.323	32.186	35.014	0	69.953	0	0
0	31.4	21.176	27.921	0	30.062	29.835	20.283	0	33.191	29.68	28.882
0	82.484	0	101.44	0	50.273	57.553	0	0	73.611	74.223	130.31
0	0	0	0	28.119	0	0	0	0	0	0	0
0	56.226	0	60.018	0	119.81	125.97	0	0	45.768	57.149	69.154
0	0	0	0	38.669	0	0	0	50.639	0	0	0
0	34.84	11.781	33.938	0	25.348	23.27	20.712	0	33.485	0	0
0	26.091	0	29.368	0	23.667	20	0	0	31.494	25.772	37.469
0	30.113	0	34.507	0	23.231	23.349	0	0	32.337	30.63	37.682
715.68	0	0	0	98.963	0	0	0	96.329	0	0	0
0	51.033	11.568	48.029	0	43.161	36.389	34.322	0	45.059	62.541	73.302
0	25.272	0	21.879	0	29.181	27.11	0	0	24.958	23.556	27.106
0	0	0	0	32.539	0	0	0	12.143	0	0	0
0	33.838	0	44.854	0	29.134	33.029	0	0	44.738	45.324	74.995
0	81.027	0	102.52	0	34.385	35.763	0	0	75.313	77.744	120.19
0	30.426	0	36.111	0	28.657	29.039	0	0	32.782	0	0
0	53.2	0	52.548	0	35.064	33.917	0	0	63.48	41.635	56.506
0	46.266	29.05	34.942	0	65.758	62.471	34.19	0	36.327	0	0
0	28.247	8.4034	29.655	0	31.89	30.552	20.691	0	28.574	0	0
0	34.059	0	33.299	0	17.876	16.309	0	0	27.099	27.606	48.554
0	43.061	5.7417	28.323	0	28.124	25.444	12.292	0	28.598	31.533	56.298
0	27.495	0	28.749	0	33.577	30.771	0	0	33.905	26.39	32.27
0	0	0	0	64.138	0	0	0	0	0	0	0
0	56.34	30.21	54.887	0	59.422	80.226	44.148	0	61.694	71.829	125.76
0	18.526	0	19.059	0	10.855	12.832	0	0	16.166	0	0
0	21.922	10.176	16.136	0	16.531	13.522	16.51	0	17.111	0	0
0	32.66	10.74	32.638	0	28.279	27.067	26.005	0	33.197	27.278	38.44
0	34.612	0	35.556	0	15.012	14.269	0	0	35.859	0	0
0	17.966	9.5286	19.349	0	9.4484	9.3879	12.212	0	20.053	0	0
0	55.507	0	60	0	63.636	72.169	0	0	65.878	58.961	69.214
0	0	0	0	20.785	0	0	0	0	0	0	0
0	0	0	0	19.317	0	0	0	10.247	0	0	0
0	47.45	34.226	42.36	0	26.03	26.856	48.557	0	47.659	43.913	43.364
0	29.497	0	27.664	0	22.038	26.18	0	0	26.166	24.452	33.036
228.42	0	0	0	17.608	0	0	0	15.713	0	0	0
0	60.636	14.364	55.354	0	81.1	63.625	33.142	0	47.521	55.706	69.21
0	32.576	13.599	36.322	0	26.045	24.123	30.186	0	37.784	0	0
0	21.246	0	29.321	0	38.741	48.075	0	0	19.139	20.771	32.308
0	54.76	0	53.597	0	88.567	67.113	0	0	61.097	0	0
0	44.075	9.5943	40.655	0	22.78	24.267	21.162	0	37.342	0	0
0	77.815	0	80.485	0	70.76	76.515	0	0	89.524	67.899	104.64
0	40.794	0	34.419	0	34.421	32.751	0	0	33.04	0	0
0	40.177	0	31.324	0	34.014	35.989	0	0	32.447	0	0
0	0	0	0	7.2109	0	0	0	0	0	0	0
0	24.899	0	31.834	0	23.94	20.893	0	0	32.313	24.683	31.582
0	0	0	0	20.514	0	0	0	0	0	0	0
0	39.412	69.262	40.585	0	28.912	31.635	127.21	0	37.353	41.44	47.58
0	44.218	0	39.639	0	26.353	41.287	0	0	46.937	45.416	81.567
0	61.036	0	65.67	0	36.345	37.413	0	0	71.534	59.426	97.728
0	71.693	12.015	64.161	0	34.547	39.318	21.621	0	74.146	78.708	101.77
0	28.512	30.083	29.493	0	15.81	19.145	26.605	0	26.74	0	0
0	55.926	15.303	64.466	0	42.935	30.249	31.564	0	51.289	0	0
0	48.19	34.265	51.258	0	32.669	35.091	43.767	0	40.816	42.588	59.557
0	40.71	37.411	36.485	0	33.234	30.956	51.375	0	29.191	0	0
0	0	0	0	79.093	0	0	0	0	0	0	0
0	123.77	0	116.16	0	104.27	80.632	0	0	124.9	0	0
0	40.395	0	42.68	0	40.295	35.618	0	0	34.123	0	0
0	0	0	0	14.201	0	0	0	31.513	0	0	0
0	19.536	0	17.445	0	25.173	32.477	0	0	16.908	0	0
0	23.41	149.95	26.923	0	21.32	18.102	69.102	0	23.54	0	0
1598.6	0	0	0	58.74	0	0	0	92.206	0	0	0
0	19.264	5.4856	18.723	0	19.851	17.149	13.29	0	20.123	0	0
0	0	0	0	23.906	0	0	0	0	0	0	0
0	65.215	377.18	73.308	0	74.219	83.911	312.49	0	84.595	0	0
0	19.53	0	18.499	0	20.426	25.749	0	0	16.921	0	0
0	16.976	0	16.173	0	18.402	18.861	0	0	20.667	0	0
0	34.732	0	38.463	0	46.266	46.169	0	0	48.317	40.126	42.76
0	123.19	0	112.17	0	110.22	123.51	0	0	122.97	0	0
0	43.158	15.589	57.142	0	33.433	33.273	25.753	0	45.507	0	0
1341.3	0	0	0	73.424	0	0	0	168.6	0	0	0
505.18	0	0	0	46.996	0	0	0	76.082	0	0	0
0	86.5	0	78.074	0	71.263	79.097	0	0	83.981	78.07	96.32
0	27.35	0	26.415	0	22.318	24.358	0	0	22.587	24.649	34.12
0	56.445	24.372	59.67	0	48.227	45.187	58.449	0	55.207	0	0
0	34.529	0	28.164	0	56.822	63.163	0	0	27.706	42.934	39.18
0	37.174	5.8736	39.217	0	35.131	32.651	18.772	0	35.393	0	0
0	0	0	0	10.322	0	0	0	0	0	0	0
0	68.207	30.356	59.77	0	31.925	29.622	64.474	0	74.077	0	0
0	49.089	0	56.824	0	65.777	69.108	0	0	57.868	58.155	64.852
0	50.421	0	53.267	0	54.23	58.363	0	0	52.095	43.76	62.36
0	99.958	0	107.26	0	81.413	89.405	0	0	102.62	0	0
0	32.121	7.3665	29.446	0	65.91	65.517	16.249	0	30.711	0	0
0	61.213	0	56.334	0	68.893	67.625	0	0	74.569	0	0
0	37.586	36.024	34.36	0	25.934	26.413	45.742	0	33.34	0	0
0	30.985	0	26.517	0	22.381	24.316	0	0	27.021	0	0
0	26.986	19.035	25.09	0	24.863	24.409	17.721	0	24.721	0	0
0	37.477	0	35.114	0	63.771	66.542	0	0	29.124	33.888	45.143
0	0	0	0	23.715	0	0	0	27.265	0	0	0
0	23.063	0	22.196	0	22.362	20.463	0	0	28.031	25.499	27.245
0	55.428	0	53.422	0	41.617	35.612	0	0	59.01	0	0
0	86.138	28.165	85.022	0	34.153	38.214	41.838	0	81.682	0	0
0	27.537	0	33.276	0	30.056	32.787	0	0	30.065	0	0
0	0	0	0	5.2858	0	0	0	2.1306	0	0	0
0	56.987	24.492	49.878	0	42.976	36.135	24.783	0	38.819	0	0
0	29.044	0	26.469	0	53.149	49.039	0	0	28.925	34.229	43.73
0	78.684	0	66.328	0	56.65	51.786	0	0	77.597	63.35	97.893
0	15.426	0	13.779	0	14.836	13.383	0	0	13.235	0	0
0	26.891	34.946	29.525	0	16.312	16.84	24.312	0	26.206	28.226	29.461
0	26.091	0	25.337	0	19.459	20.286	0	0	26.111	0	0
0	39.545	64.275	37.968	0	30.893	31.143	47.031	0	38.872	0	0
0	34.288	25.393	40.407	0	38.015	39.807	26.005	0	39.127	0	0
0	22.708	0	22.332	0	13.338	15.082	0	0	20.534	24.085	30.553
0	60.191	0	63.623	0	53.792	53.887	0	0	69.098	0	0
0	35.605	26.693	36.216	0	27.404	24.626	46.54	0	35.013	0	0
0	15.763	21.512	13.262	0	13.391	9.0733	17.595	0	12.812	0	0
0	0	0	0	14.926	0	0	0	0	0	0	0
0	26.818	13.77	21.957	0	12.292	13.073	18.614	0	24.913	0	0
0	0	0	0	35.624	0	0	0	32.438	0	0	0
0	27.81	24.449	28.981	0	15.303	17.194	32.896	0	26.367	30.228	29.419
0	33.405	39.751	34.698	0	10.42	13.208	63.823	0	28.861	33.311	45.16
0	11.067	0	9.9178	0	13.023	14.953	0	0	11.519	9.7683	13.773
0	63.396	0	74.939	0	45.434	43.581	0	0	87.491	0	0
0	0	0	0	47.518	0	0	0	52.372	0	0	0
0	127.14	0	173.78	0	118.99	131.31	0	0	151.15	199.51	193.39
0	40.012	0	45.693	0	30.615	30.962	0	0	44.919	39.59	51.6
0	100.07	9.4516	115.63	0	50.415	43.47	30.188	0	137.13	115.51	173.66
0	31.156	0	30.542	0	40.052	31.565	0	0	33.461	33.212	39.071
0	53.246	0	54.066	0	36.717	38.98	0	0	56.088	0	0
0	84.13	21.257	72.732	0	70.347	72.343	42.703	0	63.04	0	0
0	45.372	0	43.53	0	24.798	21.373	0	0	37.518	0	0
0	50.167	47.134	53.841	0	48.911	41.424	54.799	0	47.979	0	0
0	49.526	0	43.81	0	118.88	94.463	0	0	49.292	56.514	64.019
0	53.531	18.943	42.595	0	15.34	19.124	32.701	0	50.621	0	0
0	18.725	46.795	14.854	0	10.13	10.549	31.931	0	15.927	19.679	26.027
0	31.145	0	34.468	0	52.412	54.691	0	0	39.465	35.104	39.285
0	49.892	28.815	59.684	0	41.065	47.497	56.11	0	49.753	0	0
0	85.856	0	96.05	0	188.26	225.01	0	0	107.79	102.55	108.78
0	38.362	0	34.327	0	46.969	51.434	0	0	41.396	42.581	46.817
0	46.396	6.9436	44.253	0	21.7	19.257	19.435	0	45.883	0	0
0	25.568	0	21.653	0	26.447	20.427	0	0	21.776	18.348	25.09
0	0	0	0	24.569	0	0	0	25.208	0	0	0
0	21.003	13.021	23.27	0	10.609	10.939	16.9	0	27.387	0	0
0	28.149	0	21.09	0	62.251	55.713	0	0	17.532	23.711	25.326
0	26.183	0	24.238	0	15.66	17.271	0	0	22.796	25.752	40.529
0	36.508	0	41.855	0	42.025	47.752	0	0	42.556	0	0
0	0	0	0	43.783	0	0	0	0	0	0	0
0	54.211	0	44.691	0	59.005	44.772	0	0	45.4	50.492	66.632
0	45.664	19.486	41.215	0	27.681	27.397	28.53	0	48.163	36.159	66.279
0	64.47	6.1408	61.236	0	64.574	61.834	16.537	0	60.807	0	0
0	28.837	0	28.338	0	31.197	29.169	0	0	23.277	25.037	31.498
0	45.45	0	47.91	0	35.83	44.502	0	0	43.215	0	0
410.43	0	0	0	36.661	0	0	0	9.6813	0	0	0
0	0	0	0	15.163	0	0	0	12.019	0	0	0
0	66.423	0	68.469	0	70.194	54.425	0	0	61.091	59.369	97.759
0	16.882	0	14.606	0	17.254	12.907	0	0	16.843	15.569	19.158
0	76.888	7.1581	60.902	0	36.002	43.73	32.352	0	64.808	0	0
0	0	0	0	39.473	0	0	0	0	0	0	0
0	57.841	0	62.789	0	47.517	43.293	0	0	59.805	63.246	52.813
0	32.665	28.693	34.954	0	33.932	30.848	38.572	0	36.304	0	0
0	33.251	0	30.97	0	56.52	44.498	0	0	31.041	0	0
0	27.973	0	31.135	0	18.256	16.167	0	0	26.604	31.374	39.25
0	71.155	0	68.611	0	36.971	29.488	0	0	66.219	66.788	76.911
0	60.577	19.916	55.446	0	58.713	55.127	22.328	0	64.159	56.659	59.902
0	61.849	11.436	76.683	0	74.771	67.898	37.042	0	73.212	71.751	82.49
0	31.58	0	29.34	0	31.434	38.451	0	0	36.945	30.494	49.436
0	30.297	0	30.267	0	17.42	19.538	0	0	28.511	25.708	29.234
0	59.061	0	47.603	0	60.4	72.166	0	0	58.304	0	0
0	0	0	0	21.039	0	0	0	18.995	0	0	0
0	28.916	38.564	26.247	0	20.116	17.447	31.035	0	25.397	0	0
0	58.316	0	62.976	0	42.145	31.995	0	0	63.11	61.783	61.858
0	22.494	1.767	15.123	0	19.831	18.952	4.0321	0	19.709	0	0
0	0	0	0	17.016	0	0	0	21.148	0	0	0
0	27.696	1.5202	26.466	0	34.247	34.589	4.9197	0	29.114	31.043	32.833
0	0	0	0	15.674	0	0	0	15.164	0	0	0
0	40.184	0	41.629	0	59.345	72.773	0	0	33.711	46.882	52.102
0	46.019	0	47.806	0	67.976	55.444	0	0	46.284	56.275	59.377
486.39	0	0	0	47.482	0	0	0	85.677	0	0	0
0	71.705	30.315	64.061	0	80.282	71.708	58.842	0	64.78	0	0
0	47.064	0	41.759	0	30.408	34.97	0	0	37.374	37.58	55.483
0	21.159	0	24.146	0	27.346	23.989	0	0	24.189	0	0
0	78.707	10.044	74.493	0	35.878	33.78	16.108	0	58.925	0	0
0	68.299	0	63.254	0	30.959	26.52	0	0	65.046	71.039	100.42
0	40.488	0	41.025	0	29.319	30.476	0	0	45.89	0	0
0	114.17	0	116.37	0	85.11	75.05	0	0	102.89	0	0
0	44.09	0	33.907	0	65.843	88.108	0	0	55.711	46.743	57.328
0	75.032	0	72.944	0	57.091	58.743	0	0	75.675	83.588	94.904
0	56.839	0	65.106	0	46.903	62.182	0	0	58.593	0	0
0	13.651	5.3317	12.594	0	8.7922	8.0212	10.847	0	12.877	11.33	17.264
0	19.793	3.2791	20.045	0	13.606	16.75	8.2642	0	23.351	0	0
0	25.191	78.858	26.83	0	13.863	12.962	42.701	0	21.969	0	0
0	41.013	0	35.371	0	33.691	32.473	0	0	39.33	40.81	49.219
0	66.659	33.847	80.124	0	39.284	36.325	59.653	0	88.183	79.957	86.753
0	66.698	22.84	61.001	0	45.056	42.687	35.336	0	62.629	0	0
0	42.109	0	45.584	0	23.131	22.801	0	0	44.621	0	0
0	39.991	0	42.464	0	34.367	42.917	0	0	38.741	43.051	48.357
0	33.415	21.499	37.925	0	19.052	19.484	43.492	0	38.812	37.365	42.984
0	0	0	0	23.657	0	0	0	0	0	0	0
0	41.063	0	42.851	0	47.175	50.744	0	0	41.194	37.627	53.048
0	44.223	6.79	42.791	0	19.592	19.555	16.961	0	37.68	0	0
0	59.729	0	64.178	0	55.089	70.478	0	0	52.393	51.593	69.602
0	0	0	0	18.196	0	0	0	12.763	0	0	0
0	24.106	0	28.517	0	22.818	21.878	0	0	23.29	0	0
0	0	0	0	27.372	0	0	0	38.329	0	0	0
0	47.356	15.409	49.069	0	48.533	49.911	19.338	0	53.798	0	0
0	0	0	0	17.75	0	0	0	14.86	0	0	0
0	0	0	0	3.012	0	0	0	2.4874	0	0	0
0	0	0	0	15.319	0	0	0	0	0	0	0
0	13.688	0	14.271	0	19.554	18.848	0	0	17.182	0	0
0	73.608	11.337	65.381	0	28.56	34.386	35.244	0	73.037	0	0
0	32.491	0	26.238	0	28.87	26.614	0	0	26.544	29.174	60.228
0	108.15	0	111.93	0	112.07	118.78	0	0	136.1	104.56	170.25
0	0	0	0	13.213	0	0	0	0	0	0	0
0	0	0	0	36.723	0	0	0	0	0	0	0
0	27.924	7.9737	29.497	0	10.2	10.591	21.746	0	27.653	0	0
0	56.94	0	52.991	0	63.55	54.362	0	0	57.348	45.939	76.688
0	0	0	0	87.627	0	0	0	37.987	0	0	0
0	0	0	0	59.736	0	0	0	65.936	0	0	0
0	38.657	19.979	39.582	0	34.482	31.545	23.163	0	37.748	31.443	38.635
0	33.165	4.6638	40.341	0	22.503	25.131	11.347	0	35.359	28.088	34.008
0	31.331	96.032	37.222	0	39.4	34.196	43.828	0	38.854	0	0
0	46.726	0	46.725	0	122.09	150.2	0	0	46.415	39.314	68.314
0	49.078	0	45.844	0	55.744	43.748	0	0	41.651	52.603	66.94
0	73.362	0	69.703	0	63.015	57.036	0	0	57.344	70.883	81.495
0	10.308	0	11.924	0	6.147	7.1499	0	0	13.984	0	0
0	66.051	25.026	63.486	0	51.954	42.038	32.912	0	73.144	64.21	124.38
0	48.444	0	53.435	0	54.984	67.992	0	0	53.366	56.216	60.841
0	22.636	20.473	22.758	0	18.691	13.18	19.864	0	20.492	0	0
0	50.975	0	55.45	0	29.669	38.489	0	0	52.955	0	0
0	33.179	0	43.088	0	25.129	24.968	0	0	37.186	38.964	43.464
0	23.231	2.9646	28.247	0	47.092	48.082	9.4139	0	25.546	0	0
0	44.521	0	53.722	0	25.645	29.618	0	0	43.125	0	0
0	0	0	0	32.865	0	0	0	0	0	0	0
0	62.206	69.723	67.322	0	68.412	65.435	85.154	0	58.712	70.867	67.419
1183	0	0	0	40.653	0	0	0	28.784	0	0	0
0	0	0	0	4.989	0	0	0	0	0	0	0
455.37	0	0	0	36.701	0	0	0	73.501	0	0	0
0	60.19	0	65.099	0	78.921	81.914	0	0	82.823	66.706	83.633
0	28.014	0	25.237	0	40.225	36.172	0	0	24.951	27.163	44.63
0	35.268	0	40.342	0	34.694	29.153	0	0	42.113	0	0
0	20.975	0	19.631	0	21.51	23.715	0	0	19.414	18.361	37.902
0	0	0	0	31.715	0	0	0	0	0	0	0
0	70.928	0	73.468	0	43.108	36.66	0	0	63.303	0	0
0	46.926	27.86	45.882	0	37.983	41.343	48.975	0	46.379	42.763	54.755
0	40.757	0	36.417	0	40.245	47.861	0	0	43.98	40.153	50.705
0	23.872	0	23.386	0	12.034	15.988	0	0	24.755	0	0
0	63.26	65.124	47.792	0	44.755	40.436	69.538	0	48.612	0	0
0	63.189	60.286	65.427	0	65.307	69.235	57.327	0	66.773	65.763	104.62
0	54.284	0	56.533	0	27.824	24.407	0	0	52.951	0	0
0	0	0	0	28.908	0	0	0	0	0	0	0
0	38.601	0	37.818	0	34.399	50.4	0	0	33.208	28.046	49.136
0	79.618	0	93.832	0	116.11	120.21	0	0	103.33	85.308	90.245
0	27.446	1.6051	26.123	0	21.862	28.249	4.5613	0	22.813	0	0
0	78.086	0	74.06	0	46.512	69.252	0	0	88.262	0	0
0	0	0	0	15.391	0	0	0	0	0	0	0
0	61.625	0	58.544	0	42.82	47.347	0	0	55.959	67.256	80.77
0	95.154	0	94.833	0	130.58	115.39	0	0	85.124	0	0
0	38.739	5.8159	31.988	0	30.455	29.793	18.295	0	36.172	0	0
0	25.122	0	28.971	0	25.94	22.593	0	0	28.688	27.156	32.643
0	0	0	0	40.142	0	0	0	28.079	0	0	0
0	42.656	52.903	42.481	0	59.94	58.505	39.683	0	42.183	0	0
0	0	0	0	12.832	0	0	0	0	0	0	0
0	81.675	10.485	62.999	0	48.381	57.165	34.056	0	64.769	0	0
0	0	0	0	34.87	0	0	0	0	0	0	0
0	18.862	0	18.031	0	37.76	31.987	0	0	17.532	15.697	20.943
0	31.867	0	38.403	0	29.635	30.301	0	0	32.936	0	0
0	31.084	6.3989	33.519	0	27.331	29.883	12.512	0	27.656	0	0
0	39.606	0	45.642	0	34.987	29.829	0	0	43.606	47.54	46.189
0	48.146	78.652	49.403	0	32.681	33.498	88.86	0	40.613	43.715	66.629
0	20.944	17.136	20.078	0	17.826	20.203	27.26	0	18.215	23.346	30.012
153.07	0	0	0	11.793	0	0	0	4.0292	0	0	0
0	60.892	24.908	51.694	0	35.526	35.105	44.463	0	56.478	0	0
0	39.454	0	42.477	0	53.019	51.041	0	0	39.192	43.713	42.035
0	31.303	70.567	34.595	0	47.907	41.641	52.722	0	31.679	26.572	37.778
0	31.805	36.802	27.312	0	14.292	11.623	40.554	0	36.987	0	0
0	41.942	0	42.668	0	42.01	37.489	0	0	45.058	0	0
0	65.648	25.463	54.48	0	76.747	79.329	48.47	0	54.791	61.323	93.339
0	36.004	12.557	53.684	0	25.276	26.377	23.184	0	41.911	41.758	61.116
0	72.668	10.65	66.646	0	67.409	56.413	29.736	0	65.806	76.77	77.091
0	33.815	0	34.516	0	16.896	19.503	0	0	41.244	35.475	47.597
0	41.661	17.202	45.51	0	43.59	40.267	25.019	0	34.988	0	0
0	29.131	38.416	32.896	0	64.821	59.13	26.214	0	29.847	0	0
0	30.033	0	31.286	0	15.099	15.992	0	0	33.764	0	0
0	22.211	0	25.93	0	19.416	18.581	0	0	21.332	27.318	23.186
0	20.528	0	18.717	0	15.854	15.946	0	0	19.999	19.848	24.119
0	0	0	0	17.578	0	0	0	14.256	0	0	0
0	49.178	0	47.781	0	21.661	26.618	0	0	57.536	45.104	61.059
0	39.121	0	43.657	0	35.852	38.115	0	0	40.394	0	0
0	23.039	15.023	22.774	0	15.187	21.215	17.604	0	19.209	21.676	32.607
0	25.382	5.1419	25.48	0	10.675	12.215	10.499	0	26.701	0	0
0	27.887	6.8276	28.618	0	16.594	15.847	10.962	0	27.011	0	0
0	0	0	0	4.1194	0	0	0	3.9519	0	0	0
0	83.998	51.925	76.742	0	51.998	53.082	72.479	0	86.869	0	0
0	65.464	0	47.644	0	51.909	65.502	0	0	52.262	51.364	80.164
0	16.526	14.379	16.842	0	17.072	12.429	25.434	0	17.982	18.799	22.853
0	64.621	0	62.897	0	21.163	20.371	0	0	67.296	0	0
0	20.95	0	20.838	0	13.364	15.205	0	0	16.166	20.749	15.314
0	31.208	9.512	37.534	0	29.721	32.034	19.473	0	34.544	33.023	47.083
0	0	0	0	19.254	0	0	0	0	0	0	0
0	43.1	0	47.075	0	40.481	42.36	0	0	59.639	60.725	58.186
0	69.281	8.4123	55.396	0	65.995	70.521	27.097	0	77.441	62.19	78.255
0	37.01	49.327	35.894	0	25.052	20.232	48.802	0	36.841	34.149	36.653
0	28.516	13.68	33.224	0	14.64	11.51	16.83	0	26.778	0	0
0	0	0	0	14.499	0	0	0	0	0	0	0
0	19.953	0	24.705	0	19.318	20.268	0	0	20.896	23.284	25.342
0	17.042	0	13.785	0	28.155	24.068	0	0	16.646	16.445	18.494
0	27.827	0	32.148	0	16.407	18.271	0	0	26.812	0	0
0	34.941	0	40.262	0	19.77	24.496	0	0	40.461	0	0
0	25.328	94.22	21.346	0	19.169	17.037	57.069	0	25.211	0	0
0	48.528	0	48.941	0	30.072	30.014	0	0	42.666	55.294	76.234
0	36.332	92.598	49.584	0	30.557	32.409	62.732	0	41.836	0	0
0	67.984	5.2151	67.954	0	45.294	40.895	14.957	0	63.008	0	0
0	42.345	0	37.051	0	55.592	53.276	0	0	36.95	40.47	48.234
0	28.38	0	28.23	0	58.658	44.162	0	0	34.71	28.561	52.475
0	47.227	0	48.239	0	53.368	49.406	0	0	43.52	0	0
706.58	0	0	0	56.322	0	0	0	76.701	0	0	0
0	40.133	0	41.3	0	32.145	27.687	0	0	36.194	40.789	50.118
0	25.047	5.4175	28.939	0	14.289	13.957	10.571	0	20.827	0	0
0	0	0	0	13.08	0	0	0	0	0	0	0
0	35.863	0	40.547	0	33.063	34.611	0	0	35.554	45.167	43.54
0	100.75	0	104.86	0	65.969	57.076	0	0	97.609	0	0
0	0	0	0	46.616	0	0	0	0	0	0	0
0	18.96	0	16.671	0	27.999	31.293	0	0	17.258	0	0
0	12.441	0	16.131	0	12.714	17.781	0	0	14.833	13.28	16.889
0	0	0	0	11.918	0	0	0	0	0	0	0
0	37.801	0	47.859	0	112.62	103.96	0	0	43.154	44.242	54.247
0	61.733	0	56.413	0	51.489	58.974	0	0	36.634	0	0
0	14.896	0	13.986	0	10.055	10.048	0	0	16.138	0	0
0	0	0	0	14.43	0	0	0	0	0	0	0
0	23.048	0	27.7	0	30.095	21.739	0	0	26.613	21.31	32.768
0	65.147	123.27	78.861	0	58.034	58.152	124.87	0	78.782	0	0
0	44.438	0	49.045	0	49.295	73.947	0	0	53.836	0	0
0	58.22	8.8026	43.684	0	30.458	29.146	21.495	0	43.234	0	0
0	35.202	26.573	48.824	0	42.499	34.678	49.579	0	41.306	39.64	41.333
0	70.941	78.768	67.997	0	52.563	48.905	85.172	0	74.379	0	0
0	20.93	2.5474	20.534	0	15.844	13.741	6.3511	0	21.957	0	0
0	0	0	0	46.359	0	0	0	0	0	0	0
0	90.377	0	83.326	0	45.155	44.358	0	0	72.411	85.367	100.72
0	87.177	15.551	92.507	0	69.402	67.456	41.689	0	76.342	0	0
0	29.464	25.531	35.193	0	51.529	57.376	31.735	0	30.153	28.269	43.61
0	0	0	0	14.963	0	0	0	34.247	0	0	0
0	64.398	5.7735	51.687	0	35.195	35.189	14.965	0	69.432	0	0
0	41.242	0	37.802	0	38.128	40.145	0	0	39.426	35.495	48.889
0	20.674	0	19.075	0	16.446	17.147	0	0	20.227	20.852	26.394
0	28.075	7.5593	31.107	0	20.131	18.847	13.345	0	32.747	0	0
0	36.894	11.313	45.085	0	40.196	30.22	15.869	0	45.697	0	0
0	44.133	5.6575	44.88	0	34.98	35.375	16.382	0	49.767	0	0
0	71.564	4.9117	62.566	0	72.625	82.799	9.9024	0	83.741	0	0
0	27.676	0	27.663	0	28.022	30.231	0	0	23.773	30.284	31.514
0	0	0	0	18.289	0	0	0	19.239	0	0	0
0	23.883	0	28.727	0	13.665	16.775	0	0	28.005	0	0
0	35.358	0	42.938	0	39.165	43.822	0	0	44.48	38.46	46.618
0	33.811	16.733	30.938	0	23.091	21.484	23.666	0	29.226	0	0
0	11.814	0	13.648	0	11.433	12.651	0	0	13.417	0	0
0	0	0	0	10.564	0	0	0	8.5984	0	0	0
0	0	0	0	27.535	0	0	0	0	0	0	0
0	18.323	11.311	17.239	0	10.056	12.066	14.37	0	20.699	17.804	22.176
0	71.352	0	72.428	0	63.341	61.001	0	0	78.232	97.72	101.51
0	98.531	0	92.457	0	69.641	60.397	0	0	111.47	0	0
0	42.829	0	44.002	0	57.085	55.219	0	0	46.929	49.129	44.51
0	32.136	31.865	38.67	0	23.991	25.044	41.123	0	38.478	0	0
0	68.006	245.18	55.449	0	33.802	38.198	163.02	0	63.325	77.562	59.864
0	0	0	0	12.068	0	0	0	0	0	0	0
0	73.223	0	85.693	0	85.159	86.912	0	0	77.042	96.815	90.886
0	108.75	0	109.36	0	134.97	130.28	0	0	117.62	117.25	139.65
0	58.785	4.8082	57.767	0	40.331	45.753	14.189	0	60.062	0	0
0	57.941	6.5577	50.425	0	49.31	38.78	13.113	0	76.17	0	0
192.18	0	0	0	10.458	0	0	0	12.1	0	0	0
0	0	0	0	31.504	0	0	0	20.945	0	0	0
0	58.674	0	61.735	0	24.471	33.552	0	0	59.307	0	0
0	20.221	0	17.435	0	24.305	24.191	0	0	22.813	0	0
0	0	0	0	20.17	0	0	0	12.739	0	0	0
0	78.607	0	86.685	0	33.581	29.788	0	0	75.744	99.394	86.608
0	29.342	0	24.96	0	43.531	49.609	0	0	27.123	30.661	45.65
157.52	0	0	0	19.466	0	0	0	11.639	0	0	0
0	0	0	0	50.706	0	0	0	0	0	0	0
0	26.977	25.466	27.114	0	10.744	11.081	27.11	0	23.024	0	0
0	53.815	25.676	48.556	0	54.886	44.028	41.088	0	52.662	0	0
0	61.351	10.406	74.271	0	84.429	114.36	23.931	0	57.639	55.684	63.608
0	0	0	0	23.604	0	0	0	18.708	0	0	0
0	50.187	32.556	47.666	0	41.003	43.452	40.197	0	44.42	0	0
657.16	0	0	0	35.961	0	0	0	41.95	0	0	0
0	0	0	0	30.725	0	0	0	0	0	0	0
0	40.565	9.255	42.966	0	37.565	40.389	23.583	0	44.38	41.793	58.06
378.53	0	0	0	29.768	0	0	0	26.862	0	0	0
0	32.992	30.686	40.074	0	26.42	25.333	39.829	0	36.243	0	0
0	60.004	16.28	58.285	0	62.548	63.327	24.528	0	63.747	0	0
0	82.035	25.344	93.976	0	90.671	88.51	39.488	0	98.832	0	0
0	44.504	93.956	52.868	0	24.073	26.24	76.333	0	43.835	0	0
0	64.893	0	51.225	0	38.026	24.289	0	0	84.729	75.175	96.593
0	63.59	105.76	70.314	0	49.233	41.559	86.719	0	68.453	67.055	101.55
0	83.702	0	89.442	0	41.413	33.215	0	0	87.342	78.594	105.62
0	38.169	0	27.915	0	32.141	32.01	0	0	30.276	0	0
0	51.691	0	56.588	0	41.758	51.524	0	0	52.597	59.26	58.532
0	0	0	0	27.702	0	0	0	33.19	0	0	0
0	29.921	0	25.828	0	52.88	56.552	0	0	29.66	26.867	53.421
0	40.74	21.536	34.785	0	22.308	25.208	36.373	0	41.958	0	0
462.35	0	0	0	34.654	0	0	0	31.769	0	0	0
0	9.2113	0	11.064	0	13.204	15.72	0	0	9.4379	8.3172	12.148
0	58.496	0	66.91	0	61.028	59.135	0	0	69.58	0	0
0	19.838	55.035	22.681	0	17.803	15.758	40.101	0	25.255	25.074	22.045
0	0	0	0	42.5	0	0	0	0	0	0	0
0	33.456	25.791	34.962	0	25.789	34.287	30.696	0	31.881	0	0
0	17.707	0	13.424	0	12.931	16.536	0	0	14.089	0	0
0	34.954	0	38.156	0	17.419	17.734	0	0	37.915	36.776	37.792
0	29.889	0	25.3	0	42.951	44.23	0	0	32.593	30.227	39.122
0	86.691	0	79.033	0	61.741	57.432	0	0	74.734	98.507	105.74
0	29.4	0	32.292	0	30.025	27.13	0	0	32.091	0	0
0	49.195	13.687	55.532	0	33.049	38.256	21.296	0	57.257	0	0
0	107.21	0	132.86	0	88.656	77.255	0	0	115.9	0	0
0	31.125	0	33.282	0	32.185	30.383	0	0	25.687	0	0
0	50.396	8.2154	46.862	0	46.433	57.817	29.559	0	60.38	0	0
0	31.849	591.98	32.94	0	46.599	46.599	293.85	0	25.41	28.632	49.466
0	41.322	0	42.762	0	30.631	35.258	0	0	40.053	0	0
0	72.725	0	76.432	0	32.509	23.191	0	0	78.516	0	0
0	0	0	0	65.013	0	0	0	44.351	0	0	0
0	29.624	0	30.4	0	31.628	34.673	0	0	24.571	24.849	32.972
0	12.94	13.219	17.672	0	8.739	7.1751	13.099	0	14.696	16.989	15.502
0	39.808	0	35.077	0	92.002	68.042	0	0	35.593	39.312	46.465
0	0	0	0	50.609	0	0	0	39.479	0	0	0
0	44.792	338.16	59.128	0	32.267	30.298	173.32	0	44.38	0	0
0	0	0	0	18.38	0	0	0	0	0	0	0
0	54.721	177.89	47.289	0	38.216	39.018	105.57	0	57.538	0	0
0	73.574	0	73.738	0	61.586	57.734	0	0	72.869	0	0
0	58.232	67.037	56.166	0	38.985	34.299	45.964	0	49.466	0	0
0	84.215	0	78.702	0	54.501	50.96	0	0	82.846	0	0
0	0	0	0	55.39	0	0	0	53.026	0	0	0
0	0	0	0	7.3635	0	0	0	0	0	0	0
0	41.186	0	39.248	0	18.947	20.518	0	0	40.13	0	0
0	20.626	0	19.385	0	31.855	34.337	0	0	21.363	19.549	30.917
0	0	0	0	27.418	0	0	0	0	0	0	0
0	34.371	24.922	38.037	0	18.245	14.496	51.348	0	42.236	40.729	43.944
0	64.573	12.516	57.194	0	28.811	23.21	30.804	0	54.49	0	0
0	34.558	117.6	44.112	0	27.462	28.607	99.468	0	35.731	0	0
0	37.174	0	44.268	0	39.396	49.379	0	0	42.419	39.126	39.868
0	0	0	0	24.827	0	0	0	0	0	0	0
0	22.272	0	21.756	0	23.683	22.863	0	0	20.845	20.1	31.96
0	0	0	0	36.726	0	0	0	0	0	0	0
0	49.462	0	39.376	0	37.606	39.812	0	0	44.693	0	0
0	86.456	0	83.117	0	66.166	69.015	0	0	92.525	0	0
0	30.852	17.454	29.023	0	20.854	21.033	29.924	0	33.358	31.74	36.887
240.42	0	0	0	20.049	0	0	0	86.543	0	0	0
0	31.607	20.108	28.25	0	17.646	16.17	19.476	0	29.389	0	0
0	22.279	33.998	23.903	0	30.969	29.547	26.6	0	22.239	0	0
0	30.489	3.403	40.805	0	27.032	35.452	9.5004	0	31.878	41.364	32.702
0	38.099	29.352	49.054	0	29.908	32.33	30.626	0	39.12	48.029	57.216
0	47.21	0	53.038	0	18.56	18.75	0	0	52.646	0	0
428.29	0	0	0	47.499	0	0	0	208.04	0	0	0
0	0	0	0	8.3978	0	0	0	11.071	0	0	0
383.51	0	0	0	34.967	0	0	0	13.346	0	0	0
0	34.773	16.287	36.592	0	26.193	32.589	21.113	0	41.007	35.574	37.938
0	20.422	0	16.704	0	9.2322	10.121	0	0	15.624	14.299	16.918
0	69.936	32.024	72.837	0	53.766	51.84	64.18	0	71.616	0	0
0	65.582	0	59.768	0	60.397	49.535	0	0	54.041	50.583	58.852
0	45.839	0	54.176	0	32.458	33.754	0	0	54.12	0	0
0	0	0	0	21.178	0	0	0	5.8211	0	0	0
0	0	0	0	17.348	0	0	0	39.39	0	0	0
0	33.217	43.152	32.981	0	51.411	45.041	45.963	0	38.83	35.662	44.972
0	45.584	24.122	44.487	0	26.431	29.958	34.164	0	48.128	0	0
0	8.9724	0	7.7514	0	8.3378	8.1032	0	0	10.06	9.2952	10.938
0	37.682	29.918	44.781	0	37.924	42.68	45.652	0	41.925	42.082	43.215
0	84.59	8.009	85.876	0	72.776	64.106	29.68	0	95.226	0	0
0	16.884	0	17.583	0	16.804	16.965	0	0	20.014	20.448	23.51
0	57.913	0	49.642	0	56.09	54.963	0	0	56.452	50.932	49.944
0	16.948	3.5613	18.588	0	24.702	18.367	7.5039	0	16.256	0	0
0	0	0	0	14.923	0	0	0	9.1018	0	0	0
0	60.214	0	71.712	0	66.499	68.374	0	0	64.099	69.826	55.231
0	78.544	0	77.754	0	20.316	17.068	0	0	86.344	0	0
0	0	0	0	11.67	0	0	0	0	0	0	0
0	55.135	0	56.288	0	40.342	36.041	0	0	57.735	0	0
0	68.472	0	60.774	0	31.973	32.047	0	0	73.974	62.448	61.91
0	45.231	0	41.624	0	24.526	21.796	0	0	42.261	45.688	64.75
0	73.724	0	65.14	0	63.475	52.024	0	0	65.251	0	0
0	44.944	2.6418	37.253	0	33.544	41.242	9.4784	0	36.419	43.827	50.707
0	17.38	0	18.881	0	16.266	19.552	0	0	22.106	0	0
0	26.288	0	28.187	0	28.116	25.154	0	0	27.11	28.394	32.224
0	35.14	35.185	28.985	0	17.167	18.663	44.151	0	32.622	33.997	49.509
0	17.963	28.466	21.658	0	13.831	10.801	29.454	0	21.343	0	0
242.46	0	0	0	20.389	0	0	0	41.095	0	0	0
0	43.315	0	44.954	0	48.796	54.161	0	0	43.028	0	0
0	0	0	0	21.715	0	0	0	30.033	0	0	0
0	60.579	57.982	47.464	0	26.155	24.312	78.442	0	57.202	0	0
0	49.08	4.5798	46.547	0	34.987	32.973	14.747	0	45.45	0	0
0	0	0	0	6.8331	0	0	0	0	0	0	0
0	40.878	0	47.544	0	85.901	77.549	0	0	40.162	37.888	60.199
0	49.171	4.0615	40.31	0	31.413	41.172	20.267	0	47.143	0	0
0	40.846	36.229	32.159	0	25.627	27.091	37.551	0	29.318	35.376	39.955
0	19.924	15.051	25.196	0	23.624	24.922	17.358	0	26.088	23.999	30.182
0	0	0	0	3.2069	0	0	0	0	0	0	0
0	70.282	0	86.318	0	51.022	55.559	0	0	69.642	0	0
0	50.493	6.3002	50.306	0	60.091	60.288	15.832	0	43.878	46.672	47.69
0	26.034	12.347	24.231	0	13.796	17.365	18.269	0	31.32	0	0
0	54.275	15.247	50.275	0	40.716	34.77	22.238	0	66.986	0	0
0	42.209	17.332	37.2	0	55.717	56.049	31.309	0	43.709	0	0
0	0	0	0	20.411	0	0	0	0	0	0	0
0	118.87	0	103.76	0	64.745	47.812	0	0	96.616	0	0
0	41.762	51.721	37.814	0	55.817	46.348	62.651	0	35.764	32.744	43.717
0	42.673	4.9908	47.289	0	46.518	51.522	14.725	0	47.986	45.329	44.217
0	30.804	10.84	30.455	0	18.91	19.433	16.993	0	29.503	0	0
0	14.589	0	13.194	0	8.1705	6.6247	0	0	13.184	14.32	17.827
0	25.489	0	27.284	0	36.185	37.432	0	0	33.354	24.69	29.022
0	48.91	20.114	34.469	0	23.386	27.211	37.253	0	40.864	0	0
0	0	0	0	9.7612	0	0	0	21.117	0	0	0
0	35.499	8.9589	32.21	0	26.107	22.759	11.94	0	36.167	30.763	46.942
0	52.513	0	61.044	0	33.089	39.09	0	0	47.817	54.762	63.797
0	127.8	0	137.01	0	121.53	120.51	0	0	122.58	151.82	205.04
0	0	0	0	16.044	0	0	0	0	0	0	0
0	0	0	0	22.054	0	0	0	36.994	0	0	0
0	250.64	0	213.98	0	138.07	122.04	0	0	215.75	258.59	282.31
0	44.211	0	36.34	0	49.595	50.866	0	0	42.57	42.007	42.98
0	20.323	0	18.314	0	17.576	21.087	0	0	16.829	0	0
0	21.461	35.555	25.336	0	15.975	15.294	26.896	0	17.731	0	0
0	19.119	0	29.607	0	15.395	18.946	0	0	23.36	0	0
0	0	0	0	23.245	0	0	0	22.543	0	0	0
0	0	0	0	8.7324	0	0	0	7.3149	0	0	0
0	61.768	0	59.787	0	34.532	41.457	0	0	62.257	65.494	69.178
0	22.234	43.936	22.116	0	27.173	30.083	40.531	0	20.395	0	0
0	44.316	39.221	34.037	0	31.999	29.911	44.704	0	37.359	0	0
0	0	0	0	45.359	0	0	0	0	0	0	0
0	13.085	0	12.37	0	13.191	12.162	0	0	12.463	13.734	17.758
0	0	0	0	13.589	0	0	0	25.583	0	0	0
0	27.355	0	29.279	0	16.056	20.984	0	0	24.761	0	0
0	0	0	0	7.9916	0	0	0	7.5043	0	0	0
0	59.938	152.03	55.353	0	36.818	34.934	152.79	0	54.991	48.694	72.106
1030.3	0	0	0	48.619	0	0	0	72.017	0	0	0
0	27.558	19.181	31.222	0	18.294	21.284	29.751	0	26.662	0	0
0	0	0	0	2.7304	0	0	0	1.1824	0	0	0
0	42.643	52.945	41.2	0	39.398	44.357	67.822	0	45.564	0	0
0	48.67	0	38.135	0	58.245	57.328	0	0	57.061	43.558	60.031
0	12.68	41.293	15.197	0	8.8307	12.225	35.457	0	15.094	14.337	15.469
0	35.419	0	32.308	0	34.302	43.477	0	0	34.538	44.352	51.804
0	26.01	0	30.751	0	26.59	24.673	0	0	30.686	0	0
0	58	41.787	47.788	0	56.687	47.117	44.52	0	57.384	0	0
0	44.216	68.585	44.552	0	24.784	29.997	67.886	0	46.758	0	0
0	14.046	0	11.507	0	12.982	11.252	0	0	10.717	12.8	13.032
0	79.446	0	70.253	0	52.617	63.462	0	0	70.364	0	0
0	0	0	0	1.5758	0	0	0	4.9425	0	0	0
0	19.436	0	19.935	0	5.9116	7.6542	0	0	19.818	0	0
0	43.799	0	48.027	0	27.197	28.545	0	0	55.082	0	0
0	93.016	0	69.115	0	89.075	77.393	0	0	77.659	73.039	96.673
0	27.457	5.3612	35.849	0	40.328	36.349	14.703	0	30.3	29.89	37.105
0	33.472	0	31.284	0	20.967	22.449	0	0	31.235	0	0
0	119.25	65.885	137.06	0	140.93	102.68	55.14	0	95.416	0	0
0	30.482	4.2251	37.351	0	52.989	48.007	7.8818	0	31.294	34.597	41.935
0	17.091	0	16.961	0	26.766	18.31	0	0	23.449	15.082	22.901
0	38.857	178.23	35.699	0	16.137	16.486	100.37	0	36.961	42.48	55.382
0	31.226	0	35.071	0	29.202	27.802	0	0	28.828	32.341	29.722
0	37.276	18.189	43.627	0	34.602	30.589	33.806	0	50.656	0	0
0	70.672	0	46.617	0	81.985	71.073	0	0	52.56	0	0
0	83.404	0	105.01	0	120.5	127.85	0	0	101.54	0	0
0	68.73	20.578	72.53	0	45.203	55.616	39.279	0	62.742	0	0
0	14.838	6.2759	13.441	0	12.6	15.145	11.808	0	16.552	0	0
0	97.726	0	96.812	0	43.142	43.77	0	0	96.013	0	0
0	53.578	0	48.065	0	51.909	42.324	0	0	48.798	50.221	50.554
0	10.131	0	12.494	0	8.3372	8.3091	0	0	10.986	13.458	15.894
0	22.814	71.418	22.151	0	20.844	16.278	92.048	0	20.881	20.062	21.095
0	0	0	0	16.289	0	0	0	0	0	0	0
0	71.668	160.33	59.378	0	35.713	33.551	110.17	0	58.407	64.987	71.551
0	20.709	10.59	25.409	0	11.19	10.683	22.236	0	19.97	20.182	34.411
0	0	0	0	17.348	0	0	0	0	0	0	0
0	0	0	0	18.348	0	0	0	0	0	0	0
170.09	0	0	0	20.279	0	0	0	54.667	0	0	0
0	0	0	0	22.658	0	0	0	0	0	0	0
0	79.739	0	84.71	0	73.009	62.534	0	0	81.172	0	0
0	46.566	1.6766	62.051	0	22.851	23.843	5.5827	0	68.008	0	0
0	91.993	11.143	78.306	0	32.656	39.225	23.958	0	85.555	77.68	179.44
0	83.162	46.634	95.217	0	85.505	79.081	85.509	0	82.589	0	0
0	21.878	12.506	20.777	0	13.649	13.751	18.132	0	21.394	23.132	29.52
0	65.929	13.305	62.223	0	34.957	35.078	37.399	0	53.531	0	0
0	32.278	29.186	38.281	0	19.322	17.922	40.938	0	40.035	35.497	33.194
0	56.126	45.537	58.773	0	23.351	26.239	42.824	0	59.255	0	0
0	49.219	0	42.096	0	36.683	37.913	0	0	44.554	47.579	45.061
0	71.516	7.0235	62.682	0	44.883	51.721	21.358	0	58.283	64.118	69.997
0	57.592	0	52.612	0	53.496	57.274	0	0	52.06	0	0
0	51.427	15.239	50.301	0	30.922	23.695	22.673	0	50.269	0	0
0	65.859	0	64.959	0	25.351	29.883	0	0	67.178	0	0
0	37.014	0	32.169	0	23.671	25.562	0	0	29.645	34.08	41.415
0	66.973	0	55.82	0	61.398	61.719	0	0	55.296	55.49	81.51
0	20.458	0	15.173	0	16.356	21.267	0	0	13.992	19.546	23.003
0	26.726	0	26.514	0	26.842	28.884	0	0	28.156	23.794	26.09
0	55.745	69.865	53.554	0	65.087	73.041	69.039	0	57.436	0	0
0	37.616	32.239	55.907	0	21.028	26.188	44.325	0	44.505	48.862	67.544
0	0	0	0	7.6256	0	0	0	3.8779	0	0	0
0	0	0	0	8.8969	0	0	0	5.4869	0	0	0
428.77	0	0	0	57.429	0	0	0	124.95	0	0	0
193.14	0	0	0	5.5495	0	0	0	10.553	0	0	0
0	24.32	27.72	24.927	0	33.739	34.068	28.366	0	26.764	25.64	28.092
0	49.652	0	51.912	0	20.596	29.944	0	0	58.901	0	0
0	69.183	0	72.665	0	45.988	47.267	0	0	64.036	0	0
0	33.852	26.777	36.663	0	40.579	34.846	33.216	0	35.35	0	0
0	47.656	0	43.267	0	31.827	32.098	0	0	56.684	62.726	52.719
0	48.181	9.4106	37.812	0	23.191	22.379	19.659	0	49.909	0	0
307.82	0	0	0	38.149	0	0	0	60.707	0	0	0
0	33.067	18.225	32.661	0	29.287	37.052	23.625	0	43.506	36.282	50.963
0	0	0	0	21.578	0	0	0	34.797	0	0	0
0	26.342	0	26.763	0	16.715	13.827	0	0	26.252	32.899	32.641
0	0	0	0	9.7	0	0	0	0	0	0	0
0	14.598	21.557	18.192	0	11.9	12.06	35.444	0	13.51	0	0
0	48.503	7.8103	48.549	0	50.669	44.53	21.18	0	62.247	0	0
0	19.311	24.392	19.128	0	19.43	18.152	34.977	0	20.915	17.419	23.301
0	29.077	0	27.595	0	52.984	45.663	0	0	33.739	32.573	43.302
0	31.23	2.5125	29.104	0	26.58	26.297	9.6457	0	26.128	0	0
0	41.936	0	46.964	0	49.598	40.241	0	0	44.468	49.174	54.724
0	37.051	7.4896	50.141	0	47.903	43.627	22.257	0	45.032	43.224	74.192
0	56.073	155.7	58.708	0	51.167	56.913	116.62	0	49.316	53.166	60.745
446.65	0	0	0	25.468	0	0	0	12.666	0	0	0
0	20.664	55.929	19.634	0	11.922	9.1464	40.125	0	17.407	0	0
0	0	0	0	33.847	0	0	0	14.842	0	0	0
0	25.087	0	29.235	0	30.449	26.084	0	0	23.038	26.521	31.17
0	68.136	39.982	84.311	0	57.076	47.727	88.374	0	76.379	78.826	90.247
0	81.118	0	70.324	0	62.354	71.359	0	0	78.081	73.97	87.673
0	58.546	9.5769	63.415	0	41.604	38.893	23.162	0	55.596	0	0
0	23.878	0	20.97	0	19.624	22.324	0	0	24.934	25.08	33.552
417.69	0	0	0	15.335	0	0	0	18.736	0	0	0
0	0	0	0	45.929	0	0	0	25.677	0	0	0
0	22.609	0	22.604	0	25.503	24.641	0	0	23.01	18.9	29.357
225.68	0	0	0	8.6788	0	0	0	22.551	0	0	0
0	27.286	104.88	32.85	0	12.555	11.263	64.126	0	26.64	28.339	27.893
0	32.306	76.543	30.474	0	32.264	33.45	66.743	0	36.211	0	0
0	29.871	0	32.944	0	20.55	20.049	0	0	28.449	24.655	27.675
0	32.446	0	37.121	0	11.606	12.438	0	0	33.782	0	0
0	21.738	42.973	21.661	0	18.16	18.367	34.926	0	20.013	21.914	24.49
0	0	0	0	18.449	0	0	0	12.286	0	0	0
0	156.33	0	157.77	0	83.85	92.495	0	0	150.97	0	0
0	41.676	25.494	43.917	0	26.875	27.118	23.783	0	45.914	43.759	62.967
0	34.177	0	30.967	0	31.905	27.578	0	0	33.48	38.128	46.273
0	23.25	19.472	22.138	0	17.628	15.346	30.222	0	24.246	0	0
0	54.055	0	42.982	0	54.505	54.198	0	0	50.468	0	0
0	174.2	0	160.09	0	135.43	147.9	0	0	151.89	0	0
0	19.02	0	13.92	0	9.9164	9.1266	0	0	16.468	0	0
0	38.492	22.073	42.939	0	29.936	27.006	37.143	0	34.601	37.591	36.986
0	41.217	0	39.898	0	39.313	47.129	0	0	41.181	0	0
0	0	0	0	13.99	0	0	0	0	0	0	0
0	61.338	0	58.623	0	84.092	96.149	0	0	67.519	59.312	85.842
0	0	0	0	39.433	0	0	0	0	0	0	0
0	32.243	15.48	40.306	0	32.116	29.709	27.242	0	42.394	0	0
0	38.44	0	44.501	0	27.316	30.098	0	0	42.525	0	0
0	37.073	0	36.787	0	45.455	37.958	0	0	43.253	46.35	88.065
0	22.708	0	16.249	0	27.699	29.077	0	0	16.975	20.11	23.153
0	0	0	0	33.408	0	0	0	58.573	0	0	0
0	0	0	0	5.8708	0	0	0	9.208	0	0	0
0	49.933	0	64.351	0	56.081	58.579	0	0	57.062	0	0
0	175.33	0	152.78	0	113.15	122.65	0	0	165.53	0	0
0	68.474	21.442	64.335	0	46.465	49.461	27.631	0	79.186	0	0
0	20.003	0	24.014	0	17.986	20.033	0	0	23.441	0	0
0	90.273	0	83.536	0	100.52	123.34	0	0	85.515	87.826	81.143
0	9.6495	0	9.1396	0	7.0761	6.5736	0	0	10.137	11.795	16.416
0	34.599	31.38	31.629	0	32.768	26.312	33.672	0	38.527	32.81	49.754
0	47.338	0	50.374	0	48.583	52.012	0	0	42.317	44.078	56.897
0	55.878	14.438	75.205	0	30.519	27.043	31.956	0	66.915	58.643	64.197
0	27.197	75.214	26.284	0	12.636	14.662	63.896	0	24.971	0	0
0	0	0	0	24.18	0	0	0	0	0	0	0
0	22.244	0	21.332	0	13.136	11.03	0	0	22.309	0	0
0	0	0	0	34.742	0	0	0	40.846	0	0	0
0	42.934	34.763	34.293	0	45.445	46.634	48.304	0	36.105	39.472	58.665
0	0	0	0	18.551	0	0	0	21.941	0	0	0
0	0	0	0	8.3468	0	0	0	3.8979	0	0	0
0	20.586	0	24.171	0	19.874	19.515	0	0	18.859	19.557	36.031
0	0	0	0	44.622	0	0	0	63.72	0	0	0
0	34.999	0	31.961	0	38.048	32.951	0	0	31.252	33.109	36.703
0	12.763	0	11.642	0	20.032	19.84	0	0	10.793	12.536	19.708
0	23.951	0	25.393	0	20.445	18.072	0	0	29.261	23.494	40.94
0	19.583	4.908	23.322	0	23.985	19.68	11.276	0	25.437	21.947	28.621
0	19.718	0	17.805	0	20.421	27.493	0	0	21.012	18.134	24.211
0	139.95	34.049	116.79	0	55.561	55.398	65.659	0	112.43	0	0
0	0	0	0	10.014	0	0	0	13.783	0	0	0
0	94.466	0	97.006	0	67.74	56.935	0	0	95.838	0	0
0	66.586	0	61.854	0	62.917	56.759	0	0	74.422	59.368	59.382
0	26.166	3.2996	28.632	0	20.37	19.455	11.525	0	28.789	0	0
0	97.441	52.525	87.844	0	45.593	58.773	63.796	0	101.96	110.38	103.01
0	23.137	0	25.63	0	30.178	29.08	0	0	24.356	22.917	31.982
0	23.689	0	19.609	0	17.748	14.561	0	0	22.643	17.681	25.898
0	21.744	2.5737	23.202	0	15.402	14.293	11.03	0	26.224	0	0
0	0	0	0	36.226	0	0	0	0	0	0	0
0	57.244	9.7048	48.32	0	47.136	56.546	18.317	0	56.418	0	0
0	20.032	0	20.348	0	14.473	15.411	0	0	20.253	0	0
0	58.624	0	66.557	0	59.359	56.095	0	0	72.267	0	0
0	0	0	0	138.72	0	0	0	70.567	0	0	0
0	72.039	0	96.929	0	104.7	122.43	0	0	83.941	0	0
0	32.913	39.65	37.784	0	27.788	28.542	36.25	0	34.597	31.514	44.881
0	20.321	0	21.399	0	11.793	12.695	0	0	19.315	0	0
0	19.81	0	19.488	0	20.341	22.629	0	0	20.347	17.85	22.846
0	63.721	17.054	49.96	0	33.489	47.122	23.614	0	60.198	0	0
0	36.985	22.512	51.094	0	45.143	40.104	26.065	0	44.735	43.348	66.129
0	28.925	17.823	30.503	0	26.111	30.033	21.472	0	34.171	28.706	44.182
0	34.136	42.36	33.114	0	22.02	17.973	47.711	0	34.634	27.984	46.01
0	27.667	127.93	29.801	0	27.634	26.995	49.343	0	28.482	32.522	34.624
0	14.193	0	12.883	0	23.101	22.582	0	0	13.639	15.528	17.337
0	22.468	120	23.376	0	19.879	15.874	64.371	0	22.809	0	0
0	23.007	4.9575	21.908	0	9.8133	11.467	8.2418	0	31.312	0	0
0	29.398	0	32.824	0	43.803	36.801	0	0	27.742	29.263	38.379
0	34.193	0	41.067	0	33.747	32.822	0	0	32.885	33.679	38.3
0	44.741	10.234	58.739	0	41.311	43.927	30.683	0	46.793	0	0
0	30.103	0	28.765	0	16.837	14.889	0	0	36.119	28.372	39.514
0	49.83	0	53.541	0	37.077	39.81	0	0	48.901	0	0
0	28.816	27.514	26.599	0	15.913	15.081	36.7	0	28.816	32.863	34.258
0	17.746	0	20.385	0	19.473	20.39	0	0	19.506	22.824	25.389
0	64.073	9.4897	66.09	0	40.951	51.87	15.66	0	60.59	58.651	100.43
0	23.365	15.179	19.164	0	11.318	12.894	18.548	0	17.31	0	0
0	30.191	0	32.889	0	31.785	23.283	0	0	33.108	0	0
0	58.11	78.003	52.269	0	77.592	58.325	64.353	0	66.381	0	0
0	0	0	0	19.518	0	0	0	0	0	0	0
0	0	0	0	9.2483	0	0	0	0	0	0	0
0	101.38	0	81.44	0	91.059	83.971	0	0	96.421	79.648	92.23
0	35.865	67.66	28.502	0	13.549	17.02	37.049	0	31.598	0	0
0	33.594	0	31.139	0	47.038	46.947	0	0	32.629	31.825	46.909
0	0	0	0	7.5644	0	0	0	0	0	0	0
0	52.5	0	41.864	0	35.61	37.428	0	0	47.645	0	0
0	57.515	253.44	58.923	0	51.027	64.78	242.03	0	53.141	56.826	67.18
0	69.581	27.854	75.111	0	26	24.395	50.58	0	53.145	66.081	88.455
0	49.373	0	55.497	0	36.142	35.232	0	0	54.856	0	0
0	32.387	12.871	35.128	0	31.769	28.614	13.317	0	35.304	29.543	34.063
0	73.454	12.649	79.711	0	86.332	101.08	34.315	0	78.162	0	0
0	28.03	0	27.321	0	50.715	44.394	0	0	30.383	31.468	28.433
0	68.673	30.131	61.089	0	52.609	45.67	41.887	0	58.923	0	0
0	0	0	0	27.066	0	0	0	0	0	0	0
0	57.181	0	61.263	0	66.163	70.357	0	0	55.279	60.587	77.438
0	28.114	0	32.359	0	36.276	38.683	0	0	28.305	26.969	33.509
0	0	0	0	22.788	0	0	0	0	0	0	0
0	14.981	11.44	16.351	0	8.2072	8.9451	18.144	0	18.866	0	0
0	17.534	53.458	17.222	0	5.8117	7.1835	36.782	0	16.705	15.019	17.424
0	42.744	4.7745	38.384	0	41.242	38.703	10.317	0	41.126	0	0
0	39.833	0	34.011	0	24.08	30.235	0	0	39.828	38.449	55.828
0	31.845	21.423	25.563	0	38.995	44.178	29.601	0	30.831	31.322	35.016
0	0	0	0	12.159	0	0	0	15.825	0	0	0
0	41.88	24.87	38.668	0	45.774	50.179	26.066	0	43.346	0	0
0	44.737	55.864	42.366	0	16.676	19.531	73.397	0	48.074	0	0
0	38.34	0	28.634	0	26.416	26.372	0	0	32.718	36.271	38.294
0	86.039	0	74.501	0	60.015	60.791	0	0	89.159	96.898	116.09
0	26.438	0	31.655	0	16.228	17.225	0	0	33.641	0	0
0	29.44	0	40.95	0	34.028	37.162	0	0	37.09	46.882	63.472
0	28.626	4.7935	24.298	0	20.413	20.108	15.818	0	24.247	27.19	29.534
0	17.378	67.446	14.24	0	10.145	7.7424	46.199	0	15.008	0	0
0	15.706	0	12.488	0	22.943	25.885	0	0	14.648	15.096	20.873
0	32.532	56.52	31.597	0	22.045	19.829	65.609	0	37.66	0	0
0	24.873	0	25.568	0	18.095	17.895	0	0	29.369	28.78	39.759
0	42.051	4.1669	42.971	0	40.216	42.368	18.14	0	48.641	57.59	63.952
0	44.005	3.6907	47.453	0	24.999	22.282	7.8973	0	47.036	0	0
0	43.044	11.999	41.46	0	17.842	20.161	18.795	0	41.692	0	0
0	49.901	79.055	72.223	0	42.969	43.203	65.258	0	61.09	66.997	66.643
0	50.427	18.66	72.305	0	57.845	56.147	33.892	0	50.861	0	0
0	68.576	27.408	61.505	0	71.267	46.908	42.537	0	57.824	0	0
0	40.648	0	41.302	0	81.219	93.886	0	0	35.984	50.249	41.774
0	47.567	0	39.611	0	36.279	42.584	0	0	44.904	51.579	69.32
0	37.398	0	34.678	0	28.825	30.472	0	0	42.821	0	0
475.38	0	0	0	27.374	0	0	0	17.542	0	0	0
0	19.274	0	17.778	0	35.497	37.757	0	0	17.883	17.467	27.876
0	152.76	0	163.99	0	105.43	109.63	0	0	166.09	131.74	178.81
0	26.3	16.455	35.16	0	37.872	32.514	31.419	0	32.1	0	0
0	36.215	0	31.138	0	61.19	46.045	0	0	27.519	29.851	28.064
0	19.979	0	20.72	0	27.709	32.742	0	0	18.542	20.253	25.979
0	26.137	6.3517	27.858	0	15.682	14.79	19.302	0	28.442	24.698	33.764
0	26.806	16.759	26.154	0	16.192	17.793	19.417	0	25.073	0	0
0	38.671	0	42.411	0	23.243	21.886	0	0	43.046	0	0
629.17	0	0	0	15.184	0	0	0	26.499	0	0	0
0	13.507	7.0833	12.412	0	14.838	12.514	7.4288	0	13.36	0	0
0	134.25	0	107.37	0	80.771	74.02	0	0	110.54	0	0
0	47.284	35.601	46.279	0	19.589	23.959	31.446	0	48.659	0	0
0	0	0	0	47.662	0	0	0	0	0	0	0
0	0	0	0	46.714	0	0	0	0	0	0	0
0	45.067	17.255	46.097	0	17.579	16.157	27.558	0	46.788	0	0
0	0	0	0	31.503	0	0	0	0	0	0	0
0	39.468	0	37.191	0	37.665	26.549	0	0	41.003	0	0
0	0	0	0	29.889	0	0	0	30.283	0	0	0
0	73.961	0	63.172	0	45.891	41.275	0	0	81.545	66.221	84.143
0	21.533	0	24.952	0	35.612	26.228	0	0	23.498	20.418	20.722
0	41.244	0	36.089	0	29.482	23.033	0	0	38.952	0	0
0	35.698	3.7936	31.336	0	19.42	23.405	10.731	0	25.941	0	0
0	76.893	21.149	94.188	0	77.04	78.84	39.923	0	82.186	81.588	98.496
0	57.349	0	67.298	0	37.279	32.527	0	0	57.764	70.493	74.587
0	39.269	0	39.816	0	76.682	61.669	0	0	37.423	37.922	54.637
0	34.759	0	25.093	0	27.49	28.336	0	0	31.707	32.702	38.576
0	56.227	5.8604	65.652	0	59.005	62.333	23.077	0	81.953	0	0
0	0	0	0	52.871	0	0	0	49.603	0	0	0
0	31.416	0	27.121	0	30.084	34.624	0	0	28.389	29.848	43.814
0	0	0	0	46.15	0	0	0	0	0	0	0
0	0	0	0	27.779	0	0	0	0	0	0	0
0	34.229	0	37.683	0	22.8	24.864	0	0	33.925	0	0
0	0	0	0	22.504	0	0	0	0	0	0	0
0	0	0	0	2.1519	0	0	0	2.7709	0	0	0
0	31.949	0	28.274	0	22.872	18.526	0	0	27.659	0	0
0	0	0	0	33.935	0	0	0	0	0	0	0
0	61.655	0	68.155	0	36.846	32.281	0	0	69.987	71.724	57.771
0	38.346	10.796	31.084	0	17.882	20.707	14.809	0	31.022	0	0
0	24.989	42.664	23.558	0	25.158	21.935	55.51	0	22.031	0	0
0	0	0	0	19.377	0	0	0	13.805	0	0	0
0	38.134	0	34.045	0	46.086	52.993	0	0	32.971	36.488	48.147
0	36.808	4.7859	37.153	0	57.129	52.751	12.515	0	38.438	37.065	40.117
0	16.948	0	19.296	0	21.727	25.632	0	0	16.186	21.712	25.715
292.96	0	0	0	10.236	0	0	0	42.737	0	0	0
0	25.004	0	17.871	0	32.064	30.139	0	0	20.259	0	0
0	25.569	3.5781	28.376	0	15.823	15.571	6.7037	0	30.506	28.295	33.971
0	19.835	6.0744	17.572	0	18.976	16.872	12.687	0	20.379	20.741	20.632
0	25.762	0	26.234	0	16.773	18.883	0	0	24.9	0	0
0	36.519	3.9393	43.931	0	23.445	20.198	13.011	0	41.053	0	0
0	57.819	0	63.786	0	53.061	43.764	0	0	57.535	45.368	69.232
0	22.848	27.26	26.856	0	23.594	22.133	31.67	0	21.461	0	0
0	0	0	0	127.08	0	0	0	141.32	0	0	0
0	36.266	32.285	35.35	0	45.282	41.587	40.056	0	36.923	38.878	34.818
0	0	0	0	6.8583	0	0	0	0	0	0	0
0	27.43	0	32.447	0	18.007	16.311	0	0	31.625	28.823	42.313
0	20.519	0	16.219	0	18.971	19.319	0	0	18.339	16.218	22.838
0	48.246	0	42.512	0	64.79	63.151	0	0	43.51	43.354	43.265
0	69.311	0	69.316	0	159.75	169.07	0	0	74.551	76.909	110.36
0	26.516	18.883	33.216	0	25.933	19.525	24.48	0	31.105	30.098	35.689
0	28.484	0	29.187	0	18.669	22.995	0	0	27.535	0	0
0	118.72	0	141.4	0	67.743	75.413	0	0	125.67	0	0
0	22.493	0	26.089	0	41.767	40.358	0	0	25.499	22.992	24.612
0	73.659	0	74.064	0	91.369	79.058	0	0	75.209	76.78	70.114
0	52.806	0	47.005	0	41.055	59.455	0	0	53.627	0	0
0	0	0	0	15.828	0	0	0	0	0	0	0
0	34.698	0	34.564	0	71.737	73.061	0	0	42.559	36.087	46.537
412.78	0	0	0	22.07	0	0	0	76.153	0	0	0
0	0	0	0	17.945	0	0	0	34.357	0	0	0
0	41.28	101.55	44.881	0	50.618	37.688	102.92	0	37.212	0	0
0	41.702	0	51.158	0	64.324	47.646	0	0	59.231	51.857	71.488
0	39.788	16.17	44.114	0	46.926	46.121	20.173	0	44.416	0	0
0	40.573	0	52.585	0	77.831	75.95	0	0	42.705	45.665	62.26
0	20.058	0	19.407	0	12.114	11.891	0	0	17.096	0	0
0	34.396	10.586	38.784	0	34.073	25.265	16.233	0	38.139	0	0
451.51	0	0	0	25.525	0	0	0	11.418	0	0	0
0	43.106	25.678	46.325	0	63.821	58.465	37.256	0	46.425	0	0
0	59.13	0	57.213	0	48.437	45.668	0	0	62.176	0	0
0	48.084	60.453	40.273	0	31.092	31.341	82.019	0	45.68	0	0
0	60.393	15.057	53.133	0	51.836	66.513	37.009	0	53.157	0	0
0	14.798	0	14.48	0	12.872	11.5	0	0	16.411	0	0
0	99.364	46.545	95.579	0	84.475	86.144	85.26	0	81.722	96.741	122.01
0	32.717	53.267	43.718	0	19.958	17.314	75.7	0	28.117	28.557	48.557
0	32.068	44.376	39.317	0	13.064	11.6	57.263	0	33.761	0	0
0	60.1	19.933	56.486	0	32.772	38.888	40.892	0	55.328	54.516	59.903
0	45.051	3.5859	51.36	0	36.01	35.455	12.768	0	40.982	0	0
0	22.509	0	24.41	0	53.117	43.82	0	0	24.279	31.739	33.799
0	21.99	71.83	25.228	0	11.803	10.193	96.502	0	28.408	0	0
0	25.355	13.874	23.045	0	30.839	30.167	19.729	0	22.612	23.628	28.673
0	97.389	0	86.628	0	54.057	50.07	0	0	91.641	70.293	125.56
0	26.807	6.6536	22.044	0	12.271	13.618	13.323	0	24.688	0	0
0	43.262	0	39.323	0	46.287	50.956	0	0	46.242	0	0
0	62.559	0	44.869	0	63.574	57.598	0	0	51.242	56.035	63.103
0	34.183	0	32.145	0	27.144	27.11	0	0	35.331	35.141	25.591
0	0	0	0	95.53	0	0	0	41.036	0	0	0
0	36.897	0	28.548	0	27.625	28.045	0	0	36.385	23.7	45.22
0	41.689	36.495	37.228	0	31.059	30.642	33.81	0	37.242	39.967	49.845
0	5.1032	0	5.184	0	5.3922	5.6838	0	0	5.4722	5.1487	7.2088
0	125.81	0	141.19	0	81.195	99.304	0	0	118.09	108.02	114.62
0	32.296	169.75	26.995	0	16.713	19.29	105.21	0	31.59	0	0
0	51.783	0	43.441	0	50.544	55.985	0	0	49.975	0	0
0	41.997	0	40.629	0	58.105	49.08	0	0	47.528	0	0
0	68.15	0	77.098	0	148.95	145	0	0	79.225	0	0
0	38.486	13.354	43.683	0	42.052	36.718	19.757	0	38.946	43.78	49.124
0	22.888	0	27.18	0	31.67	38.223	0	0	23.996	22.49	23.722
0	101.58	0	123.57	0	78.58	74.002	0	0	93.93	0	0
0	54.359	22.196	52.998	0	31.3	27.067	39.28	0	51.056	0	0
0	43.689	0	42.18	0	27.371	27.162	0	0	31.42	46.259	53.616
0	0	0	0	19.352	0	0	0	10.291	0	0	0
0	35.832	0	38.354	0	26.748	26.404	0	0	31.98	32.844	46.265
0	107.83	0	94.901	0	48.138	45.389	0	0	112.04	125.47	100.54
0	65.638	0	68.089	0	37.304	31.903	0	0	71.409	74.389	83.37
0	39.009	49.237	48.656	0	38.388	42.95	34.748	0	40.839	0	0
0	21.743	0	20.438	0	21.074	19.933	0	0	19.054	0	0
0	38.448	7.8967	43.493	0	28.308	24.639	18.904	0	36.119	42.286	49.67
0	48.148	0	57.633	0	49.742	49.658	0	0	45.721	55.623	62.174
0	32.535	9.6643	36.233	0	53.448	34.65	11.969	0	29.921	0	0
0	37.863	0	30.098	0	33.012	37.914	0	0	27.426	32.11	29.187
0	32.417	0	31.603	0	37.542	37.699	0	0	30.483	26.062	35.518
135.8	0	0	0	15.258	0	0	0	14.493	0	0	0
0	60.612	0	54.429	0	50.553	39.847	0	0	48.879	54.59	78.615
0	34.641	0	31.387	0	55.19	53.653	0	0	31.67	37.267	52.083
0	28	0	31.891	0	37.472	29.978	0	0	39.686	32.661	37.126
0	41.332	0	33.229	0	20.826	29.494	0	0	43.009	0	0
0	0	0	0	13.147	0	0	0	0	0	0	0
0	67.481	12.632	71.89	0	24.149	22.016	29.494	0	70.152	0	0
0	24.984	0	24.021	0	17.059	19.829	0	0	29.789	26.127	34.749
0	60.36	0	57.88	0	102.81	100.44	0	0	60.745	56.614	67.918
0	0	0	0	34.734	0	0	0	0	0	0	0
0	34.002	0	43.929	0	88.648	103.98	0	0	40.451	37.604	47.835
0	119.84	0	115.49	0	68.983	70.451	0	0	116.8	0	0
0	40.017	0	35.324	0	38.541	30.03	0	0	42.016	0	0
0	42.563	0	35.246	0	64.524	60.418	0	0	37.213	30.685	46.557
0	0	0	0	23.286	0	0	0	0	0	0	0
0	27.912	66.932	26.882	0	14.945	14.634	60.037	0	24.612	28.464	44.145
0	0	0	0	20.267	0	0	0	26.397	0	0	0
0	40.357	19.116	27.803	0	21.472	24.898	32.514	0	34.652	32.347	38.127
0	0	0	0	20.774	0	0	0	0	0	0	0
0	67.194	0	58.34	0	57.732	60.88	0	0	57.549	67.464	102.47
0	27.952	0	38.387	0	57.043	53.148	0	0	36.741	28.386	25.292
0	33.049	4.0917	31.511	0	24.314	29.484	11.392	0	28.091	0	0
0	83.538	9.3418	91.007	0	22.389	24.284	24.29	0	77.36	73.31	81.49
0	0	0	0	37.567	0	0	0	0	0	0	0
0	70.084	9.7563	53.891	0	52.091	61.889	21.373	0	48.785	0	0
0	30.726	4.4134	33.423	0	28.912	23.828	13.771	0	33.689	30.355	33.779
0	0	0	0	14.666	0	0	0	0	0	0	0
0	33.593	5.2312	34.071	0	27.743	23.88	13.191	0	32.606	32.914	39.807
0	0	0	0	12.392	0	0	0	10.253	0	0	0
0	30.744	0	31.153	0	26.921	40.026	0	0	30.282	34.541	43.503
0	32.121	0	40.313	0	38.335	38.161	0	0	35.736	0	0
0	27.823	0	30.107	0	23.944	19.16	0	0	34.695	30.49	32.839
0	62.471	0	49.999	0	95.135	116.19	0	0	53.522	39.759	63.699
0	53.693	48.347	44.28	0	35.58	34.082	43.853	0	36.239	0	0
0	29.231	0	26.177	0	21.493	26.309	0	0	34.767	36.591	43.541
0	181.14	0	176.24	0	172	159.21	0	0	157	0	0
0	61.165	0	45.514	0	48.794	47.314	0	0	58.112	58.108	65.068
0	0	0	0	6.7891	0	0	0	4.876	0	0	0
0	24.147	0	26.969	0	19.743	16.719	0	0	23.165	28.977	26.378
653.93	0	0	0	54.047	0	0	0	29.018	0	0	0
1275.5	0	0	0	92.64	0	0	0	80.497	0	0	0
0	47.839	37.611	52.735	0	48.45	41.517	40.905	0	47.905	0	0
0	23.751	14.657	24.066	0	25.021	26.659	26.274	0	22.4	25.013	27.51
0	15.555	16.855	20.114	0	15.297	16.611	22.33	0	16.853	0	0
0	76.067	0	89.484	0	52.711	58.508	0	0	123.21	107.28	107.72
0	0	0	0	30.827	0	0	0	40.312	0	0	0
0	41.603	0	49.836	0	69.666	76.718	0	0	42.982	50.472	68.617
0	62.484	0	68.645	0	74.589	99.723	0	0	79.691	71.242	89.337
0	23.625	17.697	19.584	0	26.005	25.077	15.857	0	22.006	23.666	31.482
0	33.312	6.0534	31.339	0	24.784	20.757	11.784	0	34.7	0	0
0	0	0	0	23.337	0	0	0	0	0	0	0
0	77.033	0	63.235	0	84.407	91.327	0	0	66.157	65.573	75.444
0	34.362	31.829	29.678	0	20.296	20.862	20.508	0	28.716	0	0
0	0	0	0	10.199	0	0	0	4.9597	0	0	0
0	33.888	0	35.254	0	23.704	24.405	0	0	35.195	40.437	51.282
0	49.382	45.573	49.34	0	46.574	39.237	59.535	0	63.537	0	0
0	39.664	0	37.857	0	24.393	23.943	0	0	40.249	0	0
0	33.438	0	31.278	0	17.002	16.798	0	0	30.006	29.383	35.776
0	45.398	20.671	52.976	0	62.204	54.443	33.442	0	54.371	0	0
0	15.272	56.586	17.736	0	11.545	9.6788	38.93	0	16.355	15.668	18.972
0	26.163	15.021	27.831	0	13.596	11.917	20.618	0	21.943	0	0
0	21.813	0	19.904	0	24.703	21.937	0	0	20.341	18.696	24.141
0	31.44	13.312	27.898	0	24.305	23.74	23.295	0	29.827	0	0
0	47.708	0	53.896	0	44.624	48.017	0	0	45.516	55.558	55.874
0	105.25	0	102.14	0	118.3	116.75	0	0	98.273	99.531	144.16
0	29.879	0	29.951	0	36.841	35.063	0	0	39.158	38.079	44.026
0	51.027	0	55.699	0	43.139	42.754	0	0	55.137	0	0
0	73.251	51.473	73.293	0	39.371	36.879	60.617	0	75.931	62.022	76.234
0	78.956	11.552	56.065	0	107.33	107.19	26.58	0	50.988	0	0
0	47.325	69.618	46.018	0	29.847	32.286	75.045	0	52.308	40.232	57.72
0	0	0	0	10.467	0	0	0	0	0	0	0
0	26.11	0	24.233	0	26.942	24.922	0	0	27.744	25.57	33.966
0	0	0	0	7.7217	0	0	0	0	0	0	0
0	58.675	126.68	50.273	0	57.511	63.179	75.119	0	64.679	0	0
0	92.057	285.91	96.073	0	74.728	76.353	245.35	0	105.86	91.604	121.89
0	0	0	0	32.082	0	0	0	25.96	0	0	0
0	15.315	0	11.836	0	8.0554	10.867	0	0	14.447	12.69	15.904
0	45.53	3.7668	40.055	0	29.733	30.195	10.874	0	45.027	0	0
0	29.301	0	24.856	0	43.882	33.952	0	0	24.692	29.104	35.743
351.41	0	0	0	38.666	0	0	0	42.61	0	0	0
0	16.1	0	19.124	0	15.01	15.21	0	0	17.46	0	0
0	43.082	12.487	43.98	0	44.739	36.823	26.156	0	40.118	37.237	44.729
0	13.875	0	14.087	0	9.736	8.4796	0	0	12.538	12.234	18.722
0	0	0	0	19.214	0	0	0	25.355	0	0	0
0	27.956	7.5445	24.046	0	19.346	22.213	19.569	0	22.306	0	0
0	0	0	0	20.02	0	0	0	0	0	0	0
0	43.613	3.2053	46.778	0	44.066	34.41	11.27	0	45.994	43.308	55.786
0	50.853	8.2617	49.325	0	43.895	51.913	23.735	0	52.389	0	0
0	25.068	0	25.368	0	16.428	19.028	0	0	24.114	20.871	29.018
0	49.034	0	61.692	0	38.98	39.458	0	0	53.736	0	0
0	74.517	41.131	92.136	0	44.003	41.183	53.537	0	87.146	79.449	89.124
0	32.788	12.437	37.873	0	40.243	34.906	20.023	0	51.669	0	0
0	61.367	0	49.634	0	81.735	82.145	0	0	64.747	61.554	66.477
0	49.545	0	51.795	0	37.836	38.901	0	0	59.974	58.297	60.892
0	38.922	32.429	43.483	0	18.573	20.311	34.473	0	37.227	0	0
0	20.37	0	26.754	0	33.716	40.533	0	0	20.672	23.8	35.375
0	59.699	0	52.518	0	58.477	53.96	0	0	52.732	0	0
0	18.869	0	19.457	0	10.355	11.927	0	0	19.175	18.03	29.278
0	0	0	0	12.114	0	0	0	9.9074	0	0	0
0	41.12	0	42.969	0	44.476	47.054	0	0	47.839	0	0
0	77.622	0	79.188	0	116.23	143.22	0	0	77.369	87.553	81.438
0	70.812	25.075	77.524	0	98.586	97.802	49.471	0	81.724	0	0
0	67.363	42.229	65.076	0	46.868	54.553	62.801	0	54.325	57.547	108.95
0	20.541	0	22.209	0	32.505	30.56	0	0	18.48	23.872	17.937
0	113.18	8.6322	104.16	0	99.175	75.794	23.314	0	102.7	0	0
0	30.605	0	31.828	0	17.139	15.044	0	0	29.261	29.821	42.384
0	21.491	48.269	28.234	0	19.355	21.314	57.79	0	25.206	0	0
0	32.117	0	29.724	0	20.04	15.255	0	0	31.549	0	0
0	0	0	0	44.651	0	0	0	0	0	0	0
0	53.612	19.292	65.703	0	44.469	58.491	41.294	0	62.177	57.785	63.806
0	16.99	0	16.33	0	9.3767	9.7332	0	0	16.272	14.542	14.375
0	0	0	0	9.8757	0	0	0	4.2876	0	0	0
0	74.191	12.017	78.769	0	60.899	68.834	21.952	0	72.385	0	0
0	47.577	0	36.88	0	29.791	27.458	0	0	50.049	0	0
0	0	0	0	28.037	0	0	0	0	0	0	0
0	68.393	8.351	71.949	0	91.181	106.87	24.304	0	70.69	0	0
0	13.967	0	10.873	0	14.186	15.118	0	0	11.091	14.337	15.315
0	76.252	41.842	93.473	0	58.345	68.114	46.98	0	75.402	0	0
0	15.472	0	13.899	0	4.4328	3.9347	0	0	13.944	14.098	17.379
0	46.475	0	40.669	0	33.82	36.336	0	0	38.198	36.131	35.429
0	52.007	19.575	43.387	0	36.841	50.702	40.767	0	54.371	0	0
0	84.003	0	79.375	0	26.029	24.712	0	0	79.2	90.52	85.892
0	34.501	6.0907	36.445	0	36.025	38.634	16.782	0	39.927	36.22	47.844
0	65.825	0	81.01	0	54.031	60.879	0	0	65.53	65.509	90.197
0	29.903	7.2972	30.686	0	10.465	9.1316	9.2489	0	31.915	23.368	33.177
0	75.158	0	82.568	0	76.656	81.904	0	0	84.033	0	0
0	46.51	0	44.409	0	22.123	24.507	0	0	52.643	55.086	55.947
0	22.724	11.612	24.281	0	19.28	17.582	15.979	0	19.598	23.411	32.215
0	23.338	0	22.958	0	32.925	36.15	0	0	26.867	24.599	29.26
0	38.309	42.751	43.389	0	27.164	30.29	50.383	0	33.281	0	0
0	33.957	0	36.496	0	33.481	38.573	0	0	35.086	30.248	47.081
0	189.52	0	169.96	0	201.74	225.45	0	0	206.09	0	0
0	18.223	0	20.297	0	27.387	32.994	0	0	19.027	0	0
0	49.176	18.705	58.103	0	34.014	32.968	23.848	0	54.979	63.86	54.758
0	13.389	2.3647	14.651	0	11.501	13.638	5.0562	0	17.456	14.853	15.592
0	20.012	0	23.019	0	10.677	11.605	0	0	16.271	0	0
0	48.693	10.946	50.971	0	27.763	26.614	24.397	0	56.616	43.465	95.453
0	43.592	7.015	34.662	0	25.191	28.293	20.019	0	47.821	58.075	56.533
0	82.975	17.854	63.734	0	59.943	57.711	32.988	0	70.431	0	0
0	38.573	0	39.571	0	24.245	27.368	0	0	42.405	0	0
0	68.761	44.345	54.433	0	27.535	30.098	57.169	0	64.054	0	0
0	28.182	0	31.692	0	29.92	30.124	0	0	27.659	25.701	34.746
0	22.358	5.0031	23.086	0	14.608	18.498	15.657	0	21.839	26.638	35.916
0	80.71	0	66.113	0	164.14	142.15	0	0	72.585	0	0
145.6	0	0	0	21.472	0	0	0	45.473	0	0	0
0	0	0	0	10.595	0	0	0	0	0	0	0
0	37.242	0	38.773	0	26.878	32.995	0	0	36.978	38.132	50.446
0	27.295	110.18	34.651	0	17.489	18.04	50.893	0	28.472	30.573	42.77
0	49.827	0	43.414	0	20.876	20.936	0	0	44.424	0	0
0	151.6	0	139.44	0	70.732	76.764	0	0	128.91	0	0
0	21.434	0	16.009	0	16.98	18.607	0	0	15.052	0	0
0	16.249	0	16.763	0	32.674	27.483	0	0	17.022	16.093	25.159
0	0	0	0	17.237	0	0	0	0	0	0	0
0	39.996	0	37.002	0	14.648	13.488	0	0	40.497	0	0
0	57.974	0	54.706	0	102.05	85.82	0	0	78.112	58.717	66.255
0	32.552	4.0481	28.328	0	21.578	20.372	9.8426	0	36.309	0	0
0	0	0	0	17.924	0	0	0	0	0	0	0
0	0	0	0	26.636	0	0	0	0	0	0	0
0	0	0	0	35.695	0	0	0	50.14	0	0	0
0	17.112	0	25.632	0	13.78	14.842	0	0	18.135	0	0
519.61	0	0	0	48.007	0	0	0	33.008	0	0	0
0	16.468	0	18.123	0	11.492	11.707	0	0	18.878	0	0
0	30.712	0	29.056	0	27.334	30.494	0	0	30.481	0	0
0	45.864	0	46.197	0	25.927	21.006	0	0	40.447	0	0
450.93	0	0	0	17.818	0	0	0	2.1336	0	0	0
0	22.105	10.557	22.131	0	21.108	25.665	10.865	0	21.835	0	0
0	81.745	0	66.956	0	102.19	110.14	0	0	64.766	89.505	93.035
0	60.705	0	65.209	0	67.653	62.979	0	0	60.049	62.839	77.486
0	132.27	46.798	118.45	0	64.949	72.421	52.392	0	126.56	0	0
0	57.987	5.3131	54.808	0	34.616	30.669	26.956	0	66.074	0	0
0	17.567	0	19.142	0	18.913	17.412	0	0	16.436	21.442	31.409
0	23.946	22.621	26.467	0	27.636	23.624	28.623	0	31.139	0	0
951.01	0	0	0	68.584	0	0	0	88.737	0	0	0
0	35.408	0	33.625	0	20.989	22.391	0	0	42.07	0	0
0	62.991	136.95	70.18	0	21.385	24.062	136.65	0	55.252	0	0
0	0	0	0	42.533	0	0	0	39.346	0	0	0
0	39.78	0	36.553	0	57.997	66.457	0	0	43.426	0	0
0	62.681	0	64.482	0	29.987	30.958	0	0	56.145	0	0
0	16.041	0	17.577	0	11.192	9.7763	0	0	16.443	12.865	17.19
0	51.452	7.7635	57.991	0	59.054	63.071	17.229	0	49.316	52.976	47.118
0	0	0	0	52.08	0	0	0	52.723	0	0	0
0	30.027	0	23.701	0	17.865	18.411	0	0	29.994	0	0
0	40.595	174.47	43.073	0	36.108	39.001	106.16	0	41.74	0	0
0	0	0	0	5.9665	0	0	0	2.0519	0	0	0
0	34.593	0	39.563	0	61.753	67.379	0	0	37.363	37.428	48.455
0	43.545	0	43.616	0	43.852	44.681	0	0	43.997	41.071	62.042
0	0	0	0	20.648	0	0	0	0	0	0	0
0	64.264	0	75.853	0	34.775	33.096	0	0	86.69	60.952	79.791
0	28.572	0	34.112	0	42.165	32.553	0	0	29.79	33.287	32.406
0	0	0	0	9.7735	0	0	0	4.3415	0	0	0
0	25.27	0	26.82	0	16.048	16.726	0	0	19.605	20.352	22.675
0	39.16	40.663	36.297	0	37.663	35.912	31.632	0	41.663	31.867	39.754
0	19.579	0	18.033	0	19.437	16.881	0	0	17.069	19.113	20.146
0	50.042	0	36.643	0	35.187	36.948	0	0	36.038	0	0
400.39	0	0	0	31.406	0	0	0	48.294	0	0	0
0	66.955	38.544	55.469	0	47.499	43.776	43.615	0	78.108	0	0
0	0	0	0	19.39	0	0	0	25.19	0	0	0
0	22.74	15.791	20.198	0	19.69	22.309	22.573	0	22.366	19.259	21.992
0	35.173	108.59	29.783	0	30.633	25.083	71.126	0	32.292	26.784	42.224
0	0	0	0	23.423	0	0	0	45.086	0	0	0
0	38.059	0	35.459	0	39.448	34.312	0	0	38.701	0	0
0	73.425	0	63.516	0	35.072	39.516	0	0	82.62	0	0
0	29.037	106.46	31.865	0	17.524	18.858	78.634	0	27.314	30.908	28.882
0	54.119	0	54.5	0	27.286	27.892	0	0	59.191	67.622	62.345
0	20.283	0	19.445	0	34.778	26.09	0	0	21.993	22.898	24.278
0	0	0	0	21.885	0	0	0	0	0	0	0
0	33.598	16.019	37.616	0	13.431	14.92	32.851	0	40.668	0	0
0	21.703	0	21.429	0	22.952	21.02	0	0	20.388	19.566	26.907
0	18.023	31.07	13.741	0	19.035	20.254	26.737	0	15.801	0	0
0	31.796	0	31.68	0	40.608	36.867	0	0	34.328	36.175	60.504
0	0	0	0	55.46	0	0	0	62.15	0	0	0
0	38.446	0	38.865	0	38.837	32.996	0	0	35.507	0	0
0	37.416	5.2625	40.062	0	11.944	14.46	9.7	0	37.543	37.568	47.592
0	53.567	59.967	53.275	0	59.228	52.732	45.084	0	51.551	0	0
0	35.521	0	35.745	0	46.539	42.725	0	0	29.968	32.453	47.453
0	54.942	0	57.882	0	34.708	45.027	0	0	55.42	44.869	68.009
0	21.869	0	29.48	0	16.135	14.041	0	0	17.827	0	0
0	37.104	0	40.549	0	23.755	20.72	0	0	39.307	0	0
0	0	0	0	24.918	0	0	0	0	0	0	0
339.09	0	0	0	60.425	0	0	0	162.08	0	0	0
0	0	0	0	5.4684	0	0	0	5.1437	0	0	0
181.16	0	0	0	18.04	0	0	0	11.589	0	0	0
0	0	0	0	18.201	0	0	0	0	0	0	0
0	57.154	0	56.8	0	60.753	73.739	0	0	59.923	49.839	86.021
0	45.026	0	48.403	0	20.783	22.724	0	0	44.829	49.46	58.028
0	44.785	0	45.986	0	51.547	45.116	0	0	43.697	0	0
0	50.419	0	60.914	0	48.478	55.812	0	0	48.783	65.6	59.894
0	72.211	0	78.939	0	66.886	71.248	0	0	86.178	0	0
0	0	0	0	37.175	0	0	0	0	0	0	0
0	64.229	9.4522	61.177	0	56.412	44.183	26.774	0	63.305	60.256	71.955
550.22	0	0	0	80.06	0	0	0	64.053	0	0	0
0	25.077	6.2544	23.498	0	15.213	14.105	10.773	0	22.356	24.178	21.268
0	21.473	0	19.956	0	34.562	30.776	0	0	25.941	23.449	32.795
0	13.896	0	13.817	0	12.92	11.881	0	0	10.778	12.293	16.559
0	56.722	0	46.843	0	46.265	41.133	0	0	49.982	48.675	69.779
0	0	0	0	10.536	0	0	0	11.626	0	0	0
0	76.173	0	77.774	0	82.721	96.907	0	0	71.741	79.024	81.846
0	34.829	21.786	32.379	0	27.924	26.724	26.636	0	34.19	34.193	48.379
282.57	0	0	0	25.007	0	0	0	13.661	0	0	0
0	0	0	0	14.773	0	0	0	0	0	0	0
0	39.025	0	39.887	0	58.995	65.071	0	0	33.81	36.975	45.95
0	43.749	39.262	46.58	0	44.911	38.208	49.794	0	49.862	43.889	56.772
0	0	0	0	11.394	0	0	0	0	0	0	0
0	69.751	0	58.317	0	41.235	48.296	0	0	70.554	54.871	81.46
0	31.415	12.871	22.99	0	11.159	12.697	26.381	0	25.619	0	0
0	19.674	0	21.474	0	24.874	31.762	0	0	20.008	16.463	22.168
0	35.519	27.172	26.716	0	21.444	18.783	38.48	0	34.777	35.503	49.001
0	26.414	0	27.356	0	45.034	52.371	0	0	30.98	28.105	28.654
0	42.541	23.66	38.836	0	19.325	22.456	38.877	0	32.859	0	0
0	48.679	0	50.871	0	24.742	24.8	0	0	53.117	0	0
0	24.277	0	28.5	0	44.145	35.583	0	0	25.866	25.169	37.8
0	0	0	0	10.87	0	0	0	8.393	0	0	0
0	107.65	37.847	99.303	0	51.707	44.023	63.246	0	118.27	0	0
1176.6	0	0	0	124.02	0	0	0	121	0	0	0
0	25.013	99.172	21.938	0	22	27.159	82.153	0	21.267	25.987	22.337
0	35.844	0	39.068	0	42.092	46.62	0	0	37.318	30.272	45.609
0	14.743	28.091	14.388	0	7.2187	7.1314	27.913	0	14.036	14.791	18.037
0	0	0	0	26.92	0	0	0	20.015	0	0	0
0	0	0	0	18.615	0	0	0	0	0	0	0
0	27.731	0	32.196	0	26.803	32.196	0	0	29.075	22.104	32.21
0	42.123	40.784	42.882	0	45.95	40.908	35.817	0	50.491	0	0
0	27.32	0	24.232	0	29.105	24.223	0	0	27.016	24.358	28.274
0	14.2	0	18.125	0	15.582	15.477	0	0	16.306	17.848	15.503
0	11.057	0	11.315	0	12.987	12.092	0	0	10.819	10.99	17.367
0	15.981	0	14.182	0	16.523	16.651	0	0	16.427	15.096	14.928
0	23.487	0	24.098	0	23.523	27.412	0	0	25.681	22.608	39.223
0	34.067	0	27.774	0	18.319	25.141	0	0	37.416	0	0
0	0	0	0	33.057	0	0	0	45.523	0	0	0
0	91.016	10.804	66.507	0	70.981	76.6	28.78	0	68.616	0	0
0	201.48	0	155.49	0	131.07	154.16	0	0	187.19	0	0
0	36.71	233.56	38.4	0	29.567	38.811	143.18	0	42.018	41.289	41.34
0	28.812	72.374	29.828	0	44.843	42.908	59.108	0	29.145	0	0
0	42.087	95.186	33.998	0	39.219	33.539	70.512	0	32.417	32.825	40.996
0	23.617	0	23.972	0	20.496	19.677	0	0	31.909	0	0
0	38.638	0	37.399	0	30.523	31.565	0	0	34.204	0	0
0	57.048	0	55.682	0	154.96	126.58	0	0	58.919	55.869	68.214
333.42	0	0	0	11.396	0	0	0	16.659	0	0	0
0	0	0	0	8.0258	0	0	0	6.1661	0	0	0
0	47.874	5.5514	54.804	0	47.188	49.864	13.05	0	64.167	0	0
0	55.584	4.2397	40.966	0	49.278	51.847	13.69	0	48.778	0	0
0	38.382	8.2651	36.826	0	33.377	38.787	14.797	0	38.076	34.267	36.391
0	43.703	0	43.363	0	31.65	29.406	0	0	44.289	0	0
0	0	0	0	21.344	0	0	0	0	0	0	0
0	47.09	116.06	42.77	0	52.122	45.568	49.172	0	36.078	0	0
0	27.86	0	34.706	0	17.838	16.189	0	0	27.114	0	0
119.47	0	0	0	14.344	0	0	0	15.046	0	0	0
0	47.42	0	42.859	0	39.998	32.877	0	0	49.259	48.512	54.371
0	38.686	0	44.867	0	37.257	35.698	0	0	43.355	35.812	60.188
0	68.749	0	67.589	0	51.947	46.833	0	0	71.53	69.063	118.7
0	0	0	0	42.018	0	0	0	84.154	0	0	0
0	0	0	0	6.4003	0	0	0	0	0	0	0
0	38.087	0	32.76	0	22.041	32.87	0	0	34.566	35.794	29.669
0	143.78	0	157.47	0	176.67	141.88	0	0	142.75	0	0
0	0	0	0	19.235	0	0	0	0	0	0	0
0	16.677	0	16.725	0	15.268	19.157	0	0	16.325	19.619	25.446
0	21.211	0	19.571	0	5.6179	5.7924	0	0	21.191	0	0
0	45.373	0	51.116	0	20.166	25.115	0	0	63.474	0	0
0	118.66	0	85.138	0	55.042	51.339	0	0	84.392	0	0
0	70.22	0	68.832	0	95.72	91.537	0	0	69.375	66.157	64.505
0	34.775	0	32.361	0	36.135	35.329	0	0	45.131	33.244	50.274
0	0	0	0	17.307	0	0	0	0	0	0	0
0	41.283	0	37.217	0	47.028	49.343	0	0	44.43	37.569	64.519
0	48.175	14.583	56.153	0	38.869	29.621	35.453	0	47.845	65.699	49.786
0	57.907	0	57.64	0	35.832	36.4	0	0	52.954	63.604	79.061
507.97	0	0	0	23.905	0	0	0	38.258	0	0	0
0	32.94	18.665	35.661	0	16.094	19.683	27.335	0	41.787	0	0
0	48.463	6.107	43.72	0	59.992	54.192	13.614	0	44.516	0	0
479.47	0	0	0	52.25	0	0	0	37.829	0	0	0
0	38.697	37.407	38.202	0	30.981	30.794	31.035	0	35.242	0	0
0	24.798	0	19.669	0	22.162	28.536	0	0	23.912	22.475	28.804
0	37.283	0	33.401	0	23.342	25.463	0	0	32.023	0	0
0	113.7	26.123	146.11	0	104.55	91.352	63.539	0	103.73	0	0
0	0	0	0	4.0012	0	0	0	2.6595	0	0	0
123.22	0	0	0	19.778	0	0	0	18.513	0	0	0
0	71.713	0	60.958	0	70.239	55.974	0	0	58.405	71.434	66.731
0	65.774	37.017	63.091	0	41.948	41.416	50.438	0	49.743	0	0
0	33.299	0	30.92	0	40.832	39.677	0	0	34.252	34.812	48.543
0	0	0	0	20.582	0	0	0	18.617	0	0	0
0	63.747	0	58.479	0	57.039	66.61	0	0	61.195	56.498	89.329
0	26.252	17.677	26.224	0	10.876	8.4763	22.61	0	28.433	0	0
0	135.37	32.982	124.32	0	107.99	97.607	46.097	0	116.89	148.41	126.13
0	63.695	92.395	63.84	0	35.544	35.965	97.174	0	53.992	0	0
0	22.742	0	29.673	0	22.199	23.309	0	0	26.445	24.394	31.681
0	0	0	0	15.125	0	0	0	0	0	0	0
0	32.287	11.326	33.237	0	9.9287	12.966	23.129	0	23.798	0	0
0	39.418	0	50.654	0	32.173	31.457	0	0	58.505	49.938	67.826
294.71	0	0	0	8.5759	0	0	0	13.849	0	0	0
0	0	0	0	8.4708	0	0	0	14.493	0	0	0
0	39.891	46.632	38.3	0	50.282	53.556	51.307	0	36.243	0	0
0	30.591	0	33.092	0	32.187	31.891	0	0	29.831	26.469	40.724
0	35.485	0	39.713	0	31.561	29.442	0	0	40.978	0	0
0	21.903	0	23.463	0	11.01	12.747	0	0	23.643	0	0
0	30.983	0	27.12	0	114.39	91.629	0	0	28.056	27.874	34.672
0	62.359	0	47.382	0	68.62	89.662	0	0	52.843	49.783	47.922
0	33.593	0	42.6	0	49.82	53.84	0	0	44.726	0	0
0	20.429	0	16.485	0	22.79	25.747	0	0	16.758	0	0
0	36.591	0	32.961	0	43.935	48.159	0	0	39.299	37.008	43.359
0	20.135	0	20.66	0	31.152	42.388	0	0	23.466	23.245	32.361
0	46.479	17.171	43.993	0	32.946	28.548	42.906	0	44.089	0	0
263.47	0	0	0	22.207	0	0	0	43.899	0	0	0
0	14.683	10.773	13.97	0	15.441	17.799	13.86	0	13.748	14.187	19.037
0	63.397	9.9709	51.056	0	58.938	54.781	24.428	0	69.436	73.296	76.16
0	40.471	56.418	57.767	0	41.594	51.467	55.33	0	55.06	0	0
0	0	0	0	36.261	0	0	0	0	0	0	0
0	25.464	10.343	25.189	0	15.754	15.295	21.355	0	34.36	0	0
0	18.175	0	19.278	0	16.323	17.832	0	0	21.645	18.992	20.545
0	15.289	0	14.983	0	19.705	18.179	0	0	15.496	13.989	17.024
0	48.855	14.816	44.216	0	26.646	26.359	27.46	0	43.23	0	0
0	22.902	0	22.926	0	23.399	23.17	0	0	21.616	22.656	33.32
0	67.51	29.82	58.675	0	56.001	53.856	45.72	0	55.637	57.158	76.991
0	19.842	0	19.326	0	31.272	27.184	0	0	19.145	17.689	20.678
0	29.86	0	33.477	0	24.302	18.915	0	0	24.521	0	0
0	0	0	0	62.189	0	0	0	53.377	0	0	0
0	0	0	0	43.736	0	0	0	52.469	0	0	0
0	61.271	0	70.99	0	35.356	41.312	0	0	62.076	58.371	98.656
0	62.976	0	52.138	0	27.6	27.723	0	0	61.813	65.868	59.725
0	42.627	47.317	43.59	0	20.897	22.043	73.782	0	42.315	37.211	34.448
0	56.739	19.284	52.146	0	66.722	61.047	55.076	0	55.204	0	0
0	43.064	1.1661	40.782	0	20.785	17.824	4.3746	0	41.121	0	0
0	0	0	0	28.159	0	0	0	20.55	0	0	0
0	120.52	0	123.15	0	137.35	149.79	0	0	105.85	147.56	136.76
0	87.175	0	73.697	0	57.429	72.627	0	0	87.647	66.099	88.267
783.08	0	0	0	27.877	0	0	0	21.822	0	0	0
0	70.594	0	54.291	0	66.746	59.203	0	0	73.59	0	0
0	8.4125	17.79	8.8608	0	8.5281	8.0824	10.796	0	6.9372	0	0
0	0	0	0	22.571	0	0	0	0	0	0	0
0	112.4	78.849	115.83	0	66.858	75.718	90.268	0	107.89	0	0
0	39.288	90.508	48.165	0	26.631	22.973	83.788	0	42.664	42.454	61.563
0	22.06	0	18.715	0	11.932	11.09	0	0	17.654	17.474	35.537
0	49.17	32.411	47.86	0	44.425	51.613	62.055	0	35.92	0	0
0	52.963	26.879	60.038	0	61.902	57.839	20.122	0	51.778	0	0
0	66.084	22.194	62.996	0	25.847	25.757	38.653	0	59.768	0	0
0	25.835	0	25.692	0	26.68	29.458	0	0	34.117	25.147	34.607
0	51.08	0	49.461	0	41.445	37.214	0	0	56.448	0	0
486.17	0	0	0	11.183	0	0	0	7.348	0	0	0
0	17.04	0	18.646	0	13.539	15.109	0	0	20.588	0	0
0	39.931	10.974	45.882	0	41.947	46.449	22.151	0	63.787	0	0
0	0	0	0	47.16	0	0	0	24.236	0	0	0
0	61.113	0	59.118	0	100.47	86.805	0	0	68.592	64.561	84.068
0	0	0	0	19.196	0	0	0	0	0	0	0
0	36.678	0	41.931	0	50.148	44.633	0	0	39.418	34.015	48.757
0	22.445	0	24.379	0	80.22	75.002	0	0	23.247	22.806	30.454
0	33.186	0	30.853	0	25.076	26.863	0	0	32.277	0	0
0	56.371	0	47.805	0	23.353	21.774	0	0	63.325	0	0
0	0	0	0	7.3669	0	0	0	7.7206	0	0	0
0	66.359	0	60.407	0	57.016	79.855	0	0	62.69	52.849	86.647
0	49.9	15.376	59.453	0	29.268	35.234	32.39	0	50.88	0	0
546.62	0	0	0	37.144	0	0	0	20.296	0	0	0
0	16.197	21.651	15.487	0	9.4082	10.143	32.207	0	14.629	12.979	22.531
332.41	0	0	0	28.608	0	0	0	27.216	0	0	0
0	25.564	5.2683	26.437	0	23.908	21.214	20.402	0	28.94	0	0
0	44.788	22.734	37.012	0	36.429	35.993	27.042	0	41.627	0	0
0	21.385	0	20.087	0	36.771	35.033	0	0	21.772	21.421	27.823
0	23.881	5.2306	28.415	0	25.511	26.87	20.557	0	22.705	0	0
0	0	0	0	15.981	0	0	0	15.703	0	0	0
0	46.479	68.314	42.731	0	28.864	31.861	43.446	0	51.802	0	0
0	17.44	0	12.34	0	17.396	19.372	0	0	18.002	0	0
0	33.133	0	35.743	0	30.519	31.551	0	0	31.96	0	0
0	23.031	0	30.921	0	27.8	27.408	0	0	30.02	27.092	36.494
0	0	0	0	46.366	0	0	0	0	0	0	0
0	82.677	0	74.679	0	48.12	40.719	0	0	69.075	61.25	84.931
0	0	0	0	6.6064	0	0	0	10.681	0	0	0
0	24.9	0	28.636	0	20.577	22.655	0	0	29.045	23.528	36.497
0	48.971	0	50.778	0	35.468	36.995	0	0	45.529	0	0
0	23.225	45.004	23.609	0	10.036	8.4831	42.621	0	24.243	0	0
0	44.089	25.056	42.601	0	34.552	29.477	36.118	0	56.674	50.098	94.415
288.4	0	0	0	26.445	0	0	0	13.325	0	0	0
0	26.655	4.237	21.756	0	53.848	52.972	11.435	0	25.402	0	0
0	25.847	0	24.168	0	13.66	13.976	0	0	21.561	0	0
0	50.054	21.588	52.69	0	38.416	40.579	35.944	0	44.848	0	0
0	28.709	0	23.558	0	68.311	64.71	0	0	27.111	29.427	32.193
0	33.824	15.591	34.688	0	22.327	26.944	23.983	0	32.281	0	0
0	32.715	22.587	38.797	0	43.675	34.431	31.927	0	32.655	0	0
0	15.733	0	15.345	0	16.818	14.333	0	0	14.659	0	0
0	44.462	30.444	36.947	0	19.382	22.127	23.89	0	38.3	0	0
0	21.332	0	30.147	0	26.713	26.454	0	0	25.343	26.282	19.385
0	86.949	5.1203	94.627	0	123.24	118.73	18.54	0	95.594	104.61	124.8
0	0	0	0	45.274	0	0	0	0	0	0	0
0	0	0	0	14.583	0	0	0	10.419	0	0	0
0	45.151	20.506	48.61	0	61.715	52.382	36.624	0	56.489	62.061	80.185
0	33.353	32	39.577	0	33.277	29.299	38.977	0	41.046	34.399	49.785
0	16.602	0	18.486	0	27.063	27.125	0	0	17.972	15.393	21.2
0	12.974	0	12.993	0	4.8738	5.8144	0	0	14.407	0	0
0	56.725	0	51.363	0	43.639	39.822	0	0	52.285	57.88	73.926
0	42.06	0	38.361	0	31.82	33.512	0	0	39.952	0	0
0	0	0	0	13.241	0	0	0	0	0	0	0
0	0	0	0	24.213	0	0	0	49.224	0	0	0
0	44.071	0	45.22	0	50.94	63.678	0	0	48.274	45.319	50.745
296.6	0	0	0	31.327	0	0	0	20.679	0	0	0
0	27.998	0	31.299	0	19.849	25.091	0	0	31.624	28.177	36.381
0	26.208	32.919	26.925	0	13.399	14.752	24.906	0	26.051	24.858	24.699
0	117.92	0	104.22	0	105.86	135.16	0	0	131.38	0	0
0	0	0	0	24.97	0	0	0	0	0	0	0
0	22.705	0	25.366	0	21.871	18.77	0	0	23.99	25.165	23.266
0	22.237	0	24.315	0	10.017	12.417	0	0	25.253	0	0
0	20.444	28.865	18.846	0	29.109	30.053	27.723	0	20.799	18.106	20.335
0	26.285	0	25.519	0	27.085	26.366	0	0	29.7	23.2	24.911
0	75.998	67.167	74.17	0	62.799	55.655	60.548	0	70.919	0	0
0	0	0	0	40.377	0	0	0	0	0	0	0
0	24.572	37.685	30.575	0	36.21	30.894	44.754	0	30.08	26.68	33.079
0	45.639	0	63.406	0	44.431	51.911	0	0	61.294	59.659	76
0	14.885	0	17.177	0	21.241	18.524	0	0	15.832	18.369	18.262
0	77.672	0	76.922	0	102.5	75.506	0	0	69.897	79.235	74.426
0	27.797	48.192	30.229	0	41.549	37.251	47.401	0	31.401	25.229	41.435
145.05	0	0	0	13.686	0	0	0	20.681	0	0	0
0	11.295	0	10.773	0	13.822	11.873	0	0	11.669	0	0
0	37.229	0	32.763	0	28.472	26.757	0	0	41	0	0
139.62	0	0	0	6.5219	0	0	0	12.108	0	0	0
0	76.879	0	96.564	0	144.24	171.74	0	0	85.004	93.167	88.649
0	68.219	0	77.842	0	60.817	52.468	0	0	76.015	81.225	102.5
0	0	0	0	33.712	0	0	0	0	0	0	0
0	39.411	0	29.919	0	33.779	38.891	0	0	37.09	45.371	48.275
0	36.551	34.126	31.674	0	21.717	19.754	41.294	0	31.335	0	0
0	42.043	0	49.477	0	31.027	33.997	0	0	55.584	0	0
0	0	0	0	14.245	0	0	0	0	0	0	0
0	84.788	14.683	98.006	0	33.18	40.08	37.521	0	103.43	0	0
0	64.544	55.696	68.776	0	18.261	19.956	40.7	0	58.276	66.218	84.138
0	36.731	27.952	45.468	0	20.507	21.674	35.63	0	37.216	0	0
0	19.648	0	15.688	0	18.455	18.882	0	0	15.507	18.265	26.981
0	52.791	35.231	45.171	0	20.345	17.704	52.893	0	40.491	0	0
0	31.909	3.1901	36.533	0	29.024	29.288	12.883	0	29.849	0	0
0	21.845	0	25.25	0	31.06	29.127	0	0	24.627	18.041	28.616
0	47.232	19.448	40.398	0	33.752	33.731	24.334	0	42.002	48.903	51.145
0	20.709	0	26.238	0	44.464	57.047	0	0	18.255	23.987	25.808
0	64.504	0	52.637	0	23.287	25.712	0	0	60.472	0	0
0	0	0	0	12.982	0	0	0	0	0	0	0
0	58.44	25.875	52.522	0	58.518	58.198	43.791	0	72.24	0	0
0	0	0	0	59.446	0	0	0	0	0	0	0
0	68.029	0	70.413	0	66.719	67.41	0	0	59.107	0	0
0	46.859	0	49.466	0	71.947	74.462	0	0	43.025	45.186	53.779
0	31.01	5.9964	30.608	0	36.415	38.273	12.2	0	30.684	0	0
0	16.91	0	15.174	0	17.542	20.725	0	0	17.153	17.433	23.782
0	42.601	0	48.677	0	37.577	42.429	0	0	47.833	52.086	46.424
0	0	0	0	12.317	0	0	0	21.172	0	0	0
0	42.868	30.118	43.614	0	53.564	44.481	39.837	0	41.763	0	0
0	32.156	33.975	30.885	0	12.903	10.642	50.478	0	35.567	30.558	36.217
0	41.095	9.1949	49.913	0	44.455	60.493	20.181	0	39.566	39.763	63.91
0	40.762	17.265	50.645	0	56.328	55.406	38.833	0	52.081	42.989	54.127
0	37.277	0	32.727	0	42.474	37.098	0	0	34.715	0	0
0	42.782	0	56.959	0	51.027	54.358	0	0	49.103	50.241	47.954
0	29.334	0	29.304	0	28.702	27.787	0	0	24.174	33.703	29.518
0	52.035	0	42.575	0	64.095	65.321	0	0	45.434	0	0
0	40.352	0	44.15	0	65.836	56.142	0	0	41.772	51.195	44.652
0	129.74	0	110.78	0	100.22	115.88	0	0	115.41	0	0
0	27.446	0	27.253	0	24.618	23.139	0	0	29.002	25.14	34.659
0	58.599	0	61.234	0	62.03	49.763	0	0	54.225	0	0
0	69.729	0	60.462	0	46.259	36.809	0	0	77.76	55.635	59.281
0	56.088	0	57.757	0	80.453	95.669	0	0	52.656	55.555	81.186
0	17.041	0	18.413	0	11.756	10.101	0	0	16.143	20.891	21.826
0	25.439	33.558	24.571	0	29.364	22.823	33.368	0	30.803	0	0
0	60.286	42.997	45.059	0	28.152	34.771	90.904	0	55.374	0	0
0	69.446	3.6327	45.373	0	40.389	41.68	9.5022	0	61.088	0	0
0	39.022	98.221	37.367	0	33.557	39.575	71.844	0	46.455	0	0
0	46.004	83.954	48.298	0	28.762	29.692	75.805	0	39.894	0	0
0	19.644	3.8659	20.336	0	19.04	19.07	9.0774	0	21.907	0	0
0	50.211	0	53.954	0	31.659	27.166	0	0	59.819	0	0
0	84.401	118.14	85.809	0	73.366	77.686	128.11	0	87.151	97.451	96.232
0	61.88	0	55.97	0	54.936	42.574	0	0	59.155	0	0
0	0	0	0	25.995	0	0	0	0	0	0	0
0	48.795	11.748	45.439	0	35.039	43.364	16.644	0	54.554	0	0
0	21.567	0	24.029	0	20.254	17.873	0	0	26.854	24.041	23.135
0	0	0	0	18.304	0	0	0	0	0	0	0
0	58.171	0	59.521	0	74.737	67.138	0	0	58.315	0	0
0	60.116	0	65.247	0	31.912	30.221	0	0	53.203	0	0
0	31.566	0	24.599	0	32.361	35.909	0	0	25.719	28.828	39.582
0	36.53	0	39.78	0	50.651	49.097	0	0	42.053	40.828	64.739
0	70.599	29.991	58.788	0	36.322	46.149	44.284	0	56.392	0	0
0	0	0	0	116.75	0	0	0	150.09	0	0	0
0	0	0	0	32.834	0	0	0	0	0	0	0
0	60.713	0	53.308	0	72.901	70.014	0	0	54.492	53.926	82.092
0	47.033	0	43.722	0	69.427	75.521	0	0	50.526	40.721	48.248
0	30.028	17.282	27.38	0	34.495	28.946	20.379	0	33.968	25.518	29.884
0	22.632	6.159	14.871	0	13.712	12.262	11.631	0	15.907	18.657	20.881
0	25.369	0	22.312	0	41.144	39.102	0	0	24.57	21.769	32.881
0	47.555	0	52.69	0	41.01	40.681	0	0	61.387	49.399	50.969
0	31.239	52.084	24.675	0	17.262	17.639	70.014	0	28.151	0	0
0	0	0	0	31.684	0	0	0	0	0	0	0
0	46.035	0	48.34	0	44.27	50.952	0	0	45.605	49.074	65.485
0	66.359	0	60.548	0	54.672	49.922	0	0	63.099	62.732	71.615
0	51.644	6.3938	44.55	0	31.868	33.514	16.328	0	39.693	0	0
0	34.688	27.122	39.446	0	17.138	20.317	28.196	0	31.394	0	0
0	64.183	3.3143	77.875	0	61.683	71.517	12.22	0	77.439	0	0
0	51.222	0	39.121	0	56.479	32.508	0	0	31.492	44.821	43.5
0	47.664	43.318	44.53	0	51.575	42.741	32.471	0	50.08	0	0
0	11.184	0	11.963	0	13.856	14.688	0	0	13.241	0	0
0	35.504	6.1261	32.633	0	38.081	31.724	11.103	0	31.234	32.007	40.328
0	30.276	22.19	27.09	0	19.751	19.892	19.809	0	25.808	31.731	34.473
0	47.725	0	48.429	0	38.783	30.775	0	0	59.005	0	0
0	41.296	0	46.463	0	26.518	26.129	0	0	39.904	0	0
0	91.282	47.837	93.895	0	62.238	61.922	74.403	0	84.554	85.071	102.54
0	14.863	0	16.302	0	19.656	19.208	0	0	16.459	18.814	23.05
0	29.452	0	30.256	0	25.723	19.868	0	0	28.883	0	0
0	11.625	0	9.7944	0	10.631	9.8484	0	0	8.9559	8.9822	13.98
0	41.859	19.159	36.421	0	30.946	37.337	40.415	0	37.9	0	0
0	50.313	11.984	47.822	0	25.252	26.354	14.08	0	42.256	41.502	49.369
0	97.974	0	91.819	0	51.513	48.982	0	0	101.98	97.161	115.94
0	26.402	0	21.307	0	21.862	23.026	0	0	27.248	0	0
0	80.092	0	92.562	0	87.151	91.814	0	0	73.319	77.733	109.23
0	27.784	0	24.23	0	16.472	15.825	0	0	25.073	29.212	33.995
0	16.314	0	14.978	0	15.966	18.671	0	0	16.93	15.35	22.447
0	39.476	0	44.908	0	27.209	31.053	0	0	37.199	37.405	53.55
0	18.74	1.9609	20.658	0	30.516	31.539	6.8829	0	19.311	19.468	22.202
0	23.202	12.773	20.967	0	11.34	10.141	18.263	0	21.45	0	0
0	140.55	0	115.96	0	120.11	131.69	0	0	104.03	113.53	128.46
0	41.28	6.2183	36.819	0	27.266	28.951	18.434	0	42.365	51.926	57.8
0	33.588	0	35.015	0	36.428	35.303	0	0	33.994	40.102	43.833
0	0	0	0	12.371	0	0	0	0	0	0	0
0	10.139	0	11.861	0	6.9219	6.7861	0	0	10.589	11.761	14.792
0	37.946	0	31.046	0	30.524	27.012	0	0	41.946	31.121	35.733
0	80.219	13.021	86.142	0	93.852	61.728	28.391	0	77.311	82.611	99.271
0	25.408	0	27.529	0	19.204	20.47	0	0	24.847	0	0
416.33	0	0	0	25.321	0	0	0	12.304	0	0	0
0	20.086	0	22.306	0	14.699	12.082	0	0	20.257	20.215	21.753
0	47.991	111.64	52.274	0	63.528	51.68	63.565	0	53.394	49.125	60.997
0	80.077	71.383	84.855	0	77.491	80.766	94.13	0	85.957	0	0
0	33.311	0	30.141	0	44.274	48.834	0	0	29.963	32.032	36.287
0	61.729	0	62.827	0	29.417	26.004	0	0	56.513	0	0
0	0	0	0	21.189	0	0	0	18.048	0	0	0
0	75.528	0	79.604	0	30.353	29.808	0	0	77.472	0	0
0	46.494	13.4	39.05	0	50.197	41.65	23.321	0	39.611	0	0
0	29.54	24.724	25.646	0	32.013	31.027	30.832	0	29.073	0	0
0	18.106	15.212	14.279	0	14.569	15.006	19.849	0	14.287	0	0
0	132.8	0	115.71	0	166.94	185	0	0	117	0	0
0	35.807	12.715	36.113	0	19.791	17.856	22.386	0	42.671	0	0
0	0	0	0	14.97	0	0	0	0	0	0	0
0	0	0	0	31.023	0	0	0	32.396	0	0	0
0	22.194	0	21.686	0	23.294	26.435	0	0	21.889	23.496	35.98
0	9.5466	0	10.445	0	8.5734	9.7006	0	0	7.4204	0	0
0	5.6781	0	6.25	0	9.2577	8.3838	0	0	5.4149	5.5273	8.7065
0	39.727	0	49.174	0	40.479	37.967	0	0	43.458	43.882	66.017
0	59.916	1.2386	50.347	0	52.946	63.33	9.6825	0	50.046	58.91	76.755
0	54.113	0	52.971	0	56.93	45.939	0	0	53.778	51.805	69.327
0	58.755	23.843	58.991	0	35.206	33.1	37.074	0	60.487	0	0
0	23.975	26.562	21.606	0	21.567	23.691	33.359	0	28.145	25.023	38.84
0	81.727	0	88.91	0	69.887	54.316	0	0	79.298	0	0
0	43.804	0	50.921	0	38.272	34.38	0	0	53.477	48.094	63.674
0	31.682	0	27.469	0	48.673	47.238	0	0	35.528	32.481	33.187
0	10.859	0	11.464	0	8.9512	9.3973	0	0	13.618	9.8682	14.787
0	28.859	0	26.819	0	24.567	24.247	0	0	26.46	0	0
0	61.969	34.838	52.767	0	32.89	33.032	49.666	0	62.302	57.211	59.861
0	0	0	0	24.3	0	0	0	0	0	0	0
0	20.289	38.417	17.459	0	18.043	22.34	24.261	0	19.966	0	0
0	42.332	0	42.476	0	51.505	50.77	0	0	33.299	37.518	59.264
0	0	0	0	21.874	0	0	0	30.311	0	0	0
0	0	0	0	4.9846	0	0	0	5.5901	0	0	0
0	130.35	151.15	118.86	0	104.24	100.99	104.66	0	117.59	0	0
0	46.989	0	42.216	0	25.84	25.286	0	0	45.883	42.295	51.632
0	10.84	0	12.601	0	9.123	10.214	0	0	13.821	11.367	11.429
0	19.751	12.305	19.99	0	23.394	26.897	10.954	0	17.41	18.209	26.056
0	33.269	0	30.723	0	40.294	49.473	0	0	32.114	36.228	40.033
0	57.346	0	57.747	0	81.178	97.99	0	0	65.72	0	0
0	23.17	0	17.91	0	8.1886	11.579	0	0	18.337	20.074	27.739
0	24.696	0	22.293	0	38.175	33.777	0	0	21.338	0	0
0	32.866	38.898	26.872	0	18.078	18.375	44.164	0	29.008	29.323	33.652
593.72	0	0	0	33.71	0	0	0	16.177	0	0	0
0	0	0	0	28.651	0	0	0	26.419	0	0	0
0	39.772	100.11	38.477	0	32.992	32.289	66.523	0	39.322	0	0
0	36.028	0	40.151	0	38.328	32.377	0	0	43.855	0	0
0	30.765	20.099	32.89	0	17.871	21.332	22.171	0	35.994	0	0
0	0	0	0	12.888	0	0	0	19.68	0	0	0
0	12.266	15.021	11.437	0	19.469	18.088	15.108	0	9.9126	12.467	16.155
708.42	0	0	0	23.375	0	0	0	31.135	0	0	0
0	24.377	86.575	23.125	0	21.679	18.569	50.611	0	24.16	0	0
0	0	0	0	35.785	0	0	0	0	0	0	0
0	54.123	0	54.793	0	34.779	38.586	0	0	58.674	0	0
0	22.874	29.93	27.625	0	19.659	16.066	29.619	0	25.618	0	0
0	35.123	135.71	31.794	0	24.215	18.582	95.714	0	27.708	0	0
0	28.683	0	32.014	0	30.546	25.793	0	0	36.28	45.975	31.678
447.5	0	0	0	23.652	0	0	0	10.051	0	0	0
0	0	0	0	6.6674	0	0	0	0	0	0	0
0	0	0	0	20.835	0	0	0	0	0	0	0
0	66.221	0	70.048	0	80.556	84.006	0	0	51.577	64.206	75.218
0	60.268	0	58.588	0	58.866	58.389	0	0	58.375	64.41	92.033
0	11.998	0	13.558	0	16.778	16.736	0	0	12.947	11.408	16.89
0	35.142	0	37.075	0	53.63	47.442	0	0	44.659	37.665	38.193
0	0	0	0	17.856	0	0	0	0	0	0	0
0	29.765	49.007	35.661	0	32.259	28.418	54.145	0	31.264	41.18	39.176
0	49.056	0	44.539	0	62.434	54.083	0	0	50.057	51.57	59.951
0	76.502	6.8482	69.997	0	39.777	40.183	33.168	0	53.649	67.366	94.304
0	151.7	0	148.96	0	196.51	170.66	0	0	156.5	0	0
0	0	0	0	30.816	0	0	0	43.276	0	0	0
0	102.67	12.271	96.733	0	74.779	94.689	30.798	0	98.176	72.791	121.46
0	59.144	99.443	67.644	0	67.516	68.086	121.87	0	72.345	0	0
0	0	0	0	15.813	0	0	0	3.9628	0	0	0
0	43.1	9.6353	43.739	0	26.339	34.818	21.817	0	37.827	42.985	47.86
0	91.726	0	80.282	0	122.4	140.84	0	0	88.369	91.829	111.38
0	64.702	2.1158	67.099	0	32.945	31.703	8.5397	0	71.842	0	0
0	46.531	0	35.008	0	30.101	32.344	0	0	38.901	0	0
0	0	0	0	42.138	0	0	0	74.755	0	0	0
0	0	0	0	8.7751	0	0	0	0	0	0	0
0	21.619	31.671	18.668	0	22.581	20.454	28.338	0	19.545	17.095	29.506
0	47.675	29.214	45.907	0	24.486	22.026	45.809	0	40.247	43.556	53.351
0	93.472	28.581	81.733	0	36.878	42.164	36.441	0	69.423	0	0
0	25.298	21.965	25.504	0	29.88	38.799	33.969	0	23.965	0	0
0	26.465	0	24.418	0	21.777	22.679	0	0	24.91	26.494	29.985
0	60.319	13.906	56.661	0	28.97	29.947	34.503	0	52.502	0	0
0	0	0	0	5.8766	0	0	0	5.3824	0	0	0
0	0	0	0	23.512	0	0	0	12.527	0	0	0
0	50.54	0	49.624	0	30.416	36.063	0	0	59.389	60.598	66.879
0	88.591	0	76.83	0	102.36	106.42	0	0	90.182	78.737	104.51
0	60.355	8.833	48.121	0	49.411	52.33	17.303	0	63.477	0	0
0	0	0	0	8.8251	0	0	0	9.883	0	0	0
0	81.283	0	74.024	0	52.934	36.132	0	0	95.797	80.452	81.324
0	33.541	22.033	27.149	0	17.533	14.803	42.555	0	31.454	0	0
0	48.699	378.45	51.921	0	41.339	36.364	183.17	0	46.819	0	0
0	42.602	62.526	38.652	0	27.212	19.928	65.733	0	48.928	0	0
0	24.582	13.497	23.789	0	28.885	33.132	23.391	0	27.66	0	0
0	23.784	15.092	20.743	0	9.9182	11.263	16.884	0	22.758	0	0
0	32.349	9.7366	30.94	0	38.277	45.799	19.842	0	34.971	0	0
0	50.923	0	48.013	0	29.108	31.044	0	0	46.44	54.789	63.514
0	38.625	0	40.271	0	40.737	45.205	0	0	40.248	46.692	44.642
0	30.215	11.155	30.794	0	43.508	44.819	44.125	0	36.609	0	0
0	67.579	0	70.103	0	49.505	47.653	0	0	62.989	66.498	103.29
0	62.887	12.345	49.497	0	55.831	56.08	29.034	0	51.015	0	0
0	76.39	0	85.095	0	49.517	52.226	0	0	83.109	0	0
0	0	0	0	36.71	0	0	0	28.122	0	0	0
0	10.255	0	9.8338	0	8.5905	8.5571	0	0	11.551	0	0
0	52.524	0	56.946	0	53.53	51.039	0	0	56.474	54.073	75.127
0	49.862	0	58.086	0	51.258	45.461	0	0	45.402	56.109	82.546
0	45.685	12.758	41.867	0	28.859	31.193	18.999	0	39.341	0	0
0	60.842	20.011	49.715	0	42.107	38.018	27.195	0	48.139	0	0
0	0	0	0	8.759	0	0	0	0	0	0	0
0	64.447	8.3671	53.457	0	32.97	43.611	18.418	0	65.144	0	0
0	19.707	0	23.379	0	28.6	29.943	0	0	19.533	20.148	26.198
0	53.194	13.671	43.589	0	35.094	34.911	31.111	0	52.113	0	0
0	52.284	0	49.101	0	33.137	42.411	0	0	51.02	53.94	70.979
0	53.586	53.773	62.301	0	60.409	64.493	43.636	0	52.355	51.718	45.585
0	39.688	65.047	40.981	0	32.518	29.005	67.501	0	44.361	0	0
0	49.392	57.332	56.466	0	44.315	50.38	77.321	0	62.35	0	0
0	104.04	0	80.383	0	99.28	92.816	0	0	78.467	0	0
0	70.678	515.32	71.11	0	65.292	70.934	212.17	0	74.025	69.837	97.521
0	22.677	0	26.214	0	17.345	16.005	0	0	26.24	25.4	27.467
0	29.303	9.661	32.116	0	17.262	13.091	20.895	0	24.837	0	0
0	38.619	9.36	34.98	0	15.779	16.277	22.412	0	39.703	37.699	50.215
0	0	0	0	8.3471	0	0	0	0	0	0	0
0	32.846	3.2617	32.448	0	13.101	14.302	6.8683	0	30.478	0	0
0	0	0	0	40.434	0	0	0	30.723	0	0	0
0	30.82	21.373	34.438	0	27.859	23.848	24.731	0	32.963	33.467	42.869
0	0	0	0	42.922	0	0	0	0	0	0	0
0	15.805	0	21.626	0	41.824	38.647	0	0	15.746	18.123	28.122
0	33.318	13.716	31.55	0	28.748	29.857	25.209	0	31.787	0	0
0	25.862	63.146	29.125	0	28.172	23.148	72.883	0	34.687	30.422	44.245
0	36.628	0	34.004	0	42.136	53.754	0	0	33.095	0	0
0	43.387	24.312	49.7	0	34.619	30.922	31.615	0	48.649	0	0
0	21.974	0	19.988	0	17.321	22.204	0	0	23.769	21.528	23.415
0	29.034	0	29.458	0	24.76	32.836	0	0	31.27	31.232	36.415
0	88.85	5.7124	92.791	0	53.106	60.934	17.699	0	77.98	0	0
0	33.568	0	35.953	0	55.936	69.763	0	0	26.944	30.766	51.754
0	30.245	0	33.359	0	21.278	21.217	0	0	38.066	0	0
0	54.371	12.12	57.197	0	47.657	60.723	25.7	0	59.969	0	0
273.71	0	0	0	15.954	0	0	0	77.347	0	0	0
0	43.702	0	48.314	0	51.36	59.855	0	0	52.054	51.095	79.038
0	37.654	0	40.228	0	43.638	44.526	0	0	37.045	38.036	49.797
0	23.332	0	19.209	0	27.525	29.182	0	0	24.27	21.315	20.156
0	35.322	56.966	35.706	0	31.064	23.976	83.484	0	36.909	0	0
0	16.394	13.337	13.246	0	14.902	13.893	12.042	0	12.338	0	0
0	60.151	0	63	0	63.446	69.617	0	0	56.963	0	0
0	29.415	0	27.192	0	32.537	27.144	0	0	30.52	30.913	37.834
0	34.82	10.671	36.272	0	21.217	23.691	23.268	0	30.969	0	0
0	38.738	16.435	40.964	0	18.544	16.749	28.065	0	40.716	0	0
0	51.195	151.75	48.421	0	41.754	44.569	116.72	0	47.898	47.407	54.776
0	25.94	24.68	21.46	0	8.7218	8.1029	24.015	0	19.639	0	0
0	22.797	0	20.315	0	33.947	32.436	0	0	16.85	17.362	19.367
0	98.63	0	118.45	0	67.035	69.336	0	0	105.83	0	0
0	17.636	0	17.9	0	17.53	22.037	0	0	15.716	16.534	16.666
0	29.839	0	25.292	0	15.169	25.168	0	0	24.451	22.725	32.137
200.64	0	0	0	15.168	0	0	0	47.524	0	0	0
0	66.088	0	70.595	0	40.935	44.106	0	0	59.008	0	0
0	0	0	0	33.325	0	0	0	54.537	0	0	0
0	29.059	0	34.083	0	46.094	34.99	0	0	34.181	35.123	39.939
0	36.44	10.505	42.784	0	26.077	28.032	16.379	0	37.476	0	0
0	53.933	0	67.158	0	34.444	41.042	0	0	53.956	0	0
0	43.762	51.08	37.553	0	50.585	61.65	39.473	0	35.868	42.123	51.234
0	0	0	0	22.643	0	0	0	15.236	0	0	0
499.22	0	0	0	36.911	0	0	0	58.486	0	0	0
0	24.837	0	25.565	0	18.675	18.5	0	0	26.106	27.412	49.867
0	35.354	19.877	33.926	0	23.104	19.516	43.198	0	33.306	28.487	37.062
0	28.723	17.7	31.905	0	16.413	16.56	23.192	0	24.916	0	0
0	25.718	22.428	24.854	0	18	19.485	35.513	0	28.054	33.112	27.115
0	21.285	3.9611	23.563	0	10.309	14.515	13.717	0	24.964	0	0
0	23.461	0	18.776	0	12.517	13.226	0	0	21.521	20.348	39.241
0	24.975	6.6687	26.232	0	12.807	15.12	9.3151	0	23.717	23.169	21.256
0	38.308	8.2284	32.703	0	26.372	27.524	14.651	0	35.899	0	0
0	43.679	0	40.999	0	30.516	31.512	0	0	40.978	43.778	62.522
0	0	0	0	13.892	0	0	0	15.769	0	0	0
0	36.71	0	39.593	0	27.427	24.801	0	0	42.959	0	0
0	29.635	37.926	33.387	0	23.581	23.55	39.317	0	33.278	34.002	38.246
0	0	0	0	6.2761	0	0	0	0	0	0	0
0	30.497	0	27.453	0	25.222	33.439	0	0	27.678	25.387	32.564
0	0	0	0	58.16	0	0	0	0	0	0	0
0	72.057	0	49.123	0	39.993	36.898	0	0	52.224	0	0
0	57.857	0	53.035	0	30.016	21.563	0	0	54.137	53.524	63.94
0	0	0	0	15.224	0	0	0	0	0	0	0
0	35.821	14.464	40.057	0	21.218	18.598	27.489	0	38.009	0	0
0	30.216	66.969	30.772	0	16.274	20.092	46.291	0	32.602	0	0
0	8.0825	0	8.3999	0	5.9959	5.2292	0	0	7.3002	7.9766	9.5724
0	19.946	0	21.811	0	33.817	31.982	0	0	21.443	19.591	24.862
0	37.203	0	36.789	0	29.29	29.775	0	0	42.322	0	0
0	15.944	0	14.523	0	11.276	8.5517	0	0	14.655	0	0
0	92.431	0	76.372	0	68.632	54.636	0	0	76.007	73.19	87.642
0	23.981	19.993	24.499	0	11.588	11.929	30.508	0	25.123	25.25	26.102
0	66.711	0	65.267	0	73.342	74.238	0	0	56.643	63.931	103.53
0	11.373	0	10.88	0	8.662	8.732	0	0	10.641	11.38	13.061
0	27.713	14.809	31.907	0	34.273	30.509	25.253	0	34.929	0	0
0	36.859	0	37.218	0	21.766	19.561	0	0	38.385	0	0
0	30.864	105.17	33.898	0	31.797	23.387	91.273	0	35.345	0	0
0	34.607	0	33.9	0	27.144	36.711	0	0	34.271	34.725	41.434
0	13.431	0	13.883	0	10.513	10.209	0	0	12.525	0	0
0	24.378	10.369	28.16	0	14.153	14.217	18.748	0	22.61	23.039	34.386
0	47.11	0	52.101	0	64.628	66.484	0	0	49.582	51.276	99.976
0	65.069	0	70.924	0	49.642	54.584	0	0	78.401	0	0
0	12.979	66.748	11.93	0	6.2853	5.8125	35.697	0	15.808	14.481	15.873
0	34.072	154.56	39.71	0	27.897	24.864	103.93	0	41.096	0	0
0	49.204	0	43.98	0	43.482	39.708	0	0	49.606	44.215	56.321
0	59.378	0	72.94	0	60.249	62.906	0	0	77.835	68.407	75.51
0	44.519	0	53.123	0	21.899	30.668	0	0	44.234	46.552	53.457
0	31.848	22.85	33.385	0	18.661	18.236	32.052	0	30.768	33.652	34.429
0	53.742	10.741	70.154	0	17.361	17.148	20.931	0	73.07	0	0
0	25.568	0	32.569	0	30.508	24.485	0	0	29.003	0	0
0	29.315	39.304	31.464	0	10.163	9.1302	31.709	0	25.281	24.934	31.755
0	18.925	0	21.013	0	26.426	23.81	0	0	17.075	19.861	22.999
0	47.233	27.561	48.592	0	59.012	54.573	51.609	0	48.352	52.302	69.804
0	24.519	0	25.128	0	19.54	27.582	0	0	28.481	26.449	31.264
0	65.175	0	55.78	0	56.976	68.062	0	0	66.316	56.077	73.796
0	95.691	0	114.6	0	144.71	153.15	0	0	113.36	100.8	115.7
0	23.655	0	23.29	0	16.925	13.736	0	0	20.575	0	0
0	0	0	0	84.706	0	0	0	0	0	0	0
0	82.72	19.388	68.532	0	90.629	85.432	41.107	0	78.074	0	0
0	36.639	64.667	49.476	0	44.447	39.192	73.658	0	45.994	0	0
0	61.557	0	72.075	0	83.762	84.572	0	0	58.681	60.399	110.76
0	25.384	65.746	31.034	0	20.271	22.454	56.433	0	29.137	26.353	29.04
0	71.315	0	83.651	0	59.946	57.289	0	0	77.921	0	0
0	27.018	0	28.085	0	14.565	13.232	0	0	27.408	0	0
0	25.957	0	25.686	0	10.262	12.693	0	0	21.561	0	0
0	27.795	9.8139	26.592	0	14.824	19.795	11.225	0	27.142	21.855	33.713
0	30.997	8.0812	33.323	0	26.277	32.19	7.8339	0	29.902	0	0
707.37	0	0	0	41.996	0	0	0	50.482	0	0	0
0	35.476	0	31.84	0	29.971	28.807	0	0	38.684	37.456	43.582
0	0	0	0	10.093	0	0	0	10.487	0	0	0
0	66.975	0	56.313	0	54.049	66.244	0	0	52.828	0	0
0	58.35	40.887	61.985	0	40.744	36.746	63.837	0	48.905	0	0
0	0	0	0	9.8149	0	0	0	11.996	0	0	0
0	19.225	13.486	21.423	0	40.652	33.637	18.449	0	22.499	0	0
0	75.854	0	65.466	0	42.606	36.344	0	0	66.903	0	0
0	25.761	0	19.017	0	35.491	27.299	0	0	20.217	0	0
0	36.087	0	35.782	0	31.339	32.548	0	0	45.117	41.504	60.794
0	10.195	0	9.8484	0	9.1282	9.7732	0	0	10.78	0	0
0	12.362	0	11.581	0	11.221	13.082	0	0	10.797	11.85	16.476
0	53.965	0	51.822	0	40.281	50.211	0	0	58.339	41.337	59.675
0	30.888	0	34.783	0	15.81	17.815	0	0	35.017	32.069	50.873
0	110.11	27.072	132.24	0	226.29	223.38	47.173	0	156.9	91.722	119.06
0	26.611	0	27.06	0	14.642	14.069	0	0	26.524	0	0
0	37.198	23.82	44.42	0	32.708	36.537	35.923	0	45.082	45.851	51.26
0	79.176	16.418	72.089	0	80.095	79.744	41.465	0	67.255	73.219	102.92
0	0	0	0	33.874	0	0	0	76.606	0	0	0
0	0	0	0	5.7847	0	0	0	0	0	0	0
0	58.982	0	52.739	0	32.183	26.313	0	0	47.802	56.81	78.84
225.78	0	0	0	8.9652	0	0	0	16.052	0	0	0
0	19.357	0	20.428	0	17.256	14.394	0	0	21.462	0	0
0	30.006	20.227	27.028	0	26.346	23.8	21.315	0	31.449	0	0
0	50.996	0	51.351	0	30.473	34.105	0	0	41.581	50.862	69.499
0	0	0	0	5.6676	0	0	0	0	0	0	0
0	35.12	0	39.404	0	45.921	38.182	0	0	35.863	0	0
0	0	0	0	37.591	0	0	0	0	0	0	0
0	33.043	0	24.347	0	26.114	27.214	0	0	31.548	0	0
0	34.778	0	30.978	0	40.358	33.318	0	0	28.849	32.099	51.055
0	23.003	0	26.635	0	19.902	18.998	0	0	25.438	0	0
0	56.343	28.349	61.453	0	31.675	31.941	54.211	0	66.299	0	0
0	74.203	0	75.36	0	41.024	31.279	0	0	75.691	0	0
0	0	0	0	142.13	0	0	0	0	0	0	0
0	69.382	16.22	77.735	0	68.135	54.407	37.198	0	67.869	0	0
0	91.839	16.95	64.832	0	53.692	55.669	33.629	0	71.321	0	0
0	31.491	4.1849	34.46	0	23.273	25.452	12.577	0	27.823	33.009	49.786
0	32.48	13.212	38.128	0	33.559	29.584	20.579	0	32.189	40.97	45.168
0	0	0	0	26.896	0	0	0	0	0	0	0
0	24.793	11.723	24.986	0	25.673	22.524	30.057	0	26.488	22.154	28.863
0	25.415	5.4506	20.59	0	22.139	24.993	14.424	0	21.79	0	0
0	67.82	0	71.25	0	35.333	32.536	0	0	55.802	0	0
0	49.03	640.03	57.604	0	80.119	68.877	264.36	0	48.763	53.115	70.076
0	73.238	0	72.289	0	128.89	117.29	0	0	74.349	82.599	96.424
0	27.675	23.237	29.011	0	52.581	45.416	33.519	0	28.906	33.559	41.881
0	24.754	0	29.479	0	18.53	23.08	0	0	25.538	26.746	39.233
0	36.463	29.273	30.636	0	26.177	26.67	36.053	0	31.195	0	0
0	38.178	17.925	37.434	0	39.591	46.169	24.761	0	33.51	36.368	39.839
0	90.533	20.922	89.755	0	92.873	114.24	53.795	0	76.76	96.666	94.385
0	95.193	0	94.307	0	43.251	42.577	0	0	92.013	110.12	92.747
0	32.695	0	34.024	0	47.38	45.83	0	0	30.986	32.724	40.862
0	31.724	52.502	34.9	0	18.096	17.966	28.016	0	31.734	32.033	38.114
0	31.648	0	42.774	0	26.829	26.83	0	0	38.941	0	0
0	28.486	0	28.832	0	21.558	19.024	0	0	30.514	0	0
0	0	0	0	20.459	0	0	0	16.698	0	0	0
0	11.312	12.501	12.305	0	7.8079	7.0086	20.666	0	14.287	0	0
0	29.255	32.781	27.868	0	14.006	14.983	23.996	0	30.545	25.867	27.426
0	0	0	0	10.721	0	0	0	13.467	0	0	0
0	47.652	25.867	43.795	0	27.62	26.904	35.275	0	49.404	47.793	62.172
0	30.014	2.7954	30.991	0	18.014	19.31	8.38	0	29.543	0	0
0	29.776	0	33.937	0	31.022	23.674	0	0	31.921	0	0
0	0	0	0	5.3799	0	0	0	1.7861	0	0	0
0	71.094	0	70.162	0	41.809	50.736	0	0	74.57	87.905	106.93
0	19.326	0	20.046	0	31.083	28.342	0	0	28.169	21.993	30.068
0	40.609	25.287	37.95	0	55.12	49.761	24.573	0	30.666	39.091	48.52
0	29.931	16.72	37.29	0	30.546	34.674	25.152	0	43.174	39.495	48.845
0	94.085	0	103.24	0	49.391	50.81	0	0	89.018	98.095	108.2
0	80.165	4.1153	85.468	0	68.141	58.098	14.845	0	66.231	65.816	114.71
0	30.734	0	34.551	0	21.258	21.722	0	0	37.392	0	0
0	25.745	12.507	27.886	0	11.519	13.322	18.674	0	22.397	0	0
0	36.046	8.8373	37.171	0	41.816	38.493	20.123	0	41.78	0	0
0	69.134	0	85.318	0	72.082	49.994	0	0	58.352	66.079	98.821
0	36.944	84.624	42.809	0	13.036	12.911	58.442	0	34.541	38.655	35.118
0	39.653	12.328	42.532	0	34.01	36.092	20.877	0	46.055	0	0
0	28.659	41.894	34.685	0	44.691	54.279	33.321	0	25.536	0	0
462.61	0	0	0	43.884	0	0	0	21.657	0	0	0
0	15.325	0	12.021	0	5.3005	4.6842	0	0	14.61	0	0
0	31.868	1.8358	41.431	0	30.496	25.604	7.7198	0	32.403	0	0
0	58.499	0	63.56	0	38.385	43.235	0	0	64.315	0	0
0	17.212	0	14.316	0	12.165	15.186	0	0	15.276	0	0
1183.4	0	0	0	36.78	0	0	0	37.822	0	0	0
0	21.388	5.5327	19.326	0	13.592	13.754	8.2786	0	22.56	0	0
0	53.907	14.403	54.41	0	20.484	14.925	38.333	0	46.525	0	0
0	74.872	62.787	77.432	0	37.337	33.208	85.997	0	76.065	0	0
0	47.731	51.818	50.011	0	77.212	85.306	42.654	0	47.321	0	0
0	0	0	0	43.132	0	0	0	0	0	0	0
0	0	0	0	18.153	0	0	0	0	0	0	0
0	22.439	22.92	21.633	0	21.999	21.875	16.203	0	22.738	0	0
0	30.414	0	30.762	0	23.949	23.299	0	0	33.832	30.841	42.757
0	70.264	0	81.132	0	118.08	113.88	0	0	64.885	65.618	91.573
0	29.45	0	37.33	0	58.636	60.688	0	0	46.355	39.19	38.575
0	25.689	0	26.112	0	14.325	13.18	0	0	38.953	30.341	33.823
0	0	0	0	23.558	0	0	0	26.842	0	0	0
363.74	0	0	0	38.793	0	0	0	19.258	0	0	0
[truncated: 98,000 more rows]
