# Supplementary material
Source: ML conference proceedings conference paper supplement (https://proceedings.mlr.press/v139/balseiro21a.html)
Supplement: Supplementary file 3 [file balseiro21a-supp.zip › ICML_submitted_code/adx-alloc-data-2014/pub2-types.txt]

type: 1 prob: 0.071082 advertisers: [5, 9] mean: [2.9545750590298621, 2.9744159690813730] cov: [0.6077849631503327, 0.5799235326003315, 0.8723629847405954]
type: 2 prob: 0.039601 advertisers: [1, 5, 9] mean: [6.0147684869748099, 3.2842335570748782, 3.2953752642719460] cov: [0.3624833425670098, 0.2564882901569383, 0.4169467427796028, 0.1920631466954672, 0.3603799303249028, 0.6702296191616632]
type: 3 prob: 0.154471 advertisers: [2, 4, 6, 7, 10] mean: [3.6983314239197220, 3.6975854264662309, 3.4420527517055728, 3.4420823907851861, 3.6974820055977262] cov: [0.3212777941982685, 0.3104226859528139, 0.3196928891627027, 0.3069236799785914, 0.3056769466466253, 0.4191374551662008, 0.3067773538819590, 0.3056317011036525, 0.4088919417110007, 0.4186893123517597, 0.3114678572255027, 0.3103435763616215, 0.3066743518713397, 0.3066430442146244, 0.3209824467940614]
type: 4 prob: 0.296028 advertisers: [2, 4, 6, 7, 10, 11, 12] mean: [3.5681490895003392, 3.5689117839792082, 3.5772466372601759, 3.5791997147733090, 3.5687499813241401, 3.5692954018449519, 3.7801041697486828] cov: [0.3307723114204302, 0.3206690776900191, 0.3307701190709862, 0.2873623968671690, 0.2861829437271837, 0.4007911150648062, 0.2877080727245759, 0.2866630997567819, 0.3917574877359777, 0.4027526418860280, 0.3198742700678188, 0.3196526285152334, 0.2858786905936507, 0.2864701285515237, 0.3287806642744337, 0.3205897901709500, 0.3204265456756108, 0.2868471323998948, 0.2871523363010389, 0.3195126823684291, 0.3298389024892128, 0.3186705194524229, 0.3186127548678920, 0.2876146559292937, 0.2880497588978904, 0.3177397153983855, 0.3182783513789929, 0.3446669772093165]
type: 5 prob: 0.144204 advertisers: [2, 3, 4, 6, 7, 8, 10, 11, 12] mean: [3.6306634368480348, 3.0004336377806688, 3.6315744669282770, 3.3865676305492238, 3.3878382402756082, 3.3950855576691810, 3.6293681178232000, 3.6298192303666910, 3.8354185457042091] cov: [0.2308816705091749, 0.0790812193539978, 1.0790214402775580, 0.2195385302451593, 0.0784373510970128, 0.2281698998794615, 0.2120385539981047, 0.0650026143228752, 0.2107067618545979, 0.3372532884779085, 0.2118634118629504, 0.0655589339887504, 0.2106014487535279, 0.3268248944288123, 0.3363451793019140, 0.1423253584713333, 0.6706795048547566, 0.1414209142840463, 0.1287460159928778, 0.1283589647967004, 0.5085491405213601, 0.2200276495205321, 0.0769317389776743, 0.2190915749751196, 0.2120885249391889, 0.2119817608629301, 0.1407346790290756, 0.2295502216366349, 0.2201258068249015, 0.0770101891318373, 0.2191208794151664, 0.2115193410483723, 0.2115173204685953, 0.1410272852446536, 0.2193855671112059, 0.2293348282815838, 0.2165107654109076, 0.0791545404700943, 0.2155874140532723, 0.2059467033653725, 0.2059416565523272, 0.1427844398460139, 0.2159449431990387, 0.2160443677301085, 0.2378500633128617]
type: 6 prob: 0.067242 advertisers: [5] mean: [2.9658337725198360] cov: [0.4714925084838865]
type: 7 prob: 0.227373 advertisers: [2, 3, 4, 6, 7, 8, 10] mean: [3.6657905256473420, 3.0174925314244279, 3.6632397682751918, 3.3908634271929170, 3.3885534304651328, 3.4208016147717251, 3.6640819264608289] cov: [0.2163493070210281, 0.0620981481772143, 1.0546069097816111, 0.2064895629823939, 0.0615433937015559, 0.2169082532460432, 0.2055540089681309, 0.0603130412572305, 0.2056333431167984, 0.3268536846114840, 0.2045759880890713, 0.0588524187824972, 0.2043936752149280, 0.3164842912192612, 0.3261609003577678, 0.1235314913304601, 0.6462427389626881, 0.1231010198922762, 0.1188791575657571, 0.1175183244914117, 0.4821728144406366, 0.2068136887738377, 0.0621108180626576, 0.2069510227418407, 0.2053506882718890, 0.2039833453826592, 0.1232801095657108, 0.2171146987513644]
