# Supplementary material
Source: ML conference proceedings conference paper supplement (https://proceedings.mlr.press/v139/balseiro21a.html)
Supplement: Supplementary file 3 [file balseiro21a-supp.zip › ICML_submitted_code/code/compute_opt.py]

import main
import sys
import cvxpy as cp
import numpy as np

"""
Solve the offline primal problem to optimality using cvxpy and mosek, and print the optimal function value.
"""

if __name__ == "__main__":
  if len(sys.argv) == 2:
    data_name = sys.argv[1]

  all_data = main.load_data(data_name)

  A = np.transpose(np.array(all_data.revenue))
  m, T = np.shape(A)
  rho = all_data.rho
  lambd = 0.1
  x = cp.Variable((m, T))

  objective = cp.Maximize(cp.sum(cp.multiply(A,x)) + \
                          lambd * cp.sum(cp.entr(x)) + \
                          lambd * cp.sum(cp.entr(1-cp.sum(x, axis=0))))
  constraints = [x>=0, cp.sum(x, axis=0)<=1, cp.sum(x, axis=1)<= T*rho]

  prob = cp.Problem(objective, constraints)
  result = prob.solve(solver='MOSEK', verbose=True)

  print(prob.value)
